# Supplementary material for: Application of 4′- C -α-aminoethoxy-2′- O -methyl-5-propynyl-uridine for antisense therapeutics
Source: Royal Society of Chemistry journal article supplement (doi:10.1039/d4ra06376g), 2024-01-01

## Supporting Information

### Application of 4'-C- $\alpha$ -aminoethoxy-2'-O-methyl-5-propynyl-uridine for antisense therapeutics

Yujun Zhou<sup>a</sup>, Hitotaka Sato<sup>a</sup>, Miwa Kawade<sup>b</sup>, Kenji Yamagishi<sup>c</sup> and Yoshihito Ueno<sup>\*a, b, c, d</sup>

<sup>a</sup>The United Graduate School of Agriculture Science (UGSAS), Gifu University, <sup>b</sup>Faculty of Applied Biological Sciences, Gifu University, <sup>c</sup>Graduate School of Natural Sciences and Technology, Gifu University, <sup>d</sup>Center for One Medicine Innovative Translational Research (COMIT), Tokai National Higher Education and Research System, Gifu University, 1-1 Yanagido, Gifu, 501-1193, Japan.

<sup>e</sup>Department of Chemical Biology and Applied Chemistry, College of Engineering, Nihon University, 1 Nakagawara, Tokusada, Tamuramachi, Koriyama, Fukushima 963-8642, Japan.

\*To whom correspondence should be addressed.

Phone: +81-58-293-2919; Fax: +81-58-293-2919.

E-mail: [ueno.yoshihito.e7@f.gifu-u.ac.jp](mailto:ueno.yoshihito.e7@f.gifu-u.ac.jp)

*Keywords:* Antisense oligonucleotides, RNase H, 4'-Aminoethoxy, 2'-Methoxy, 5-Propynyl

## Contents

Table S1. The sequences of all oligonucleotides used in this study.

Figure S1. The UV melting profiles of DNA/RNA duplexes in this study.

Figure S2. The graphical data of  $1/T_m$  vs  $\ln(C_T/4)$  plots.

Figure S3. CD spectrum of DNA/RNA duplexes in this study.

Figure S4. The changes of time-dependent RMSD (Å) of each nucleoside.

Figure S5. Pseudorotational phase angle ( $P$ ) of each nucleoside.

Figure S6. PAGE analysis of single-stranded oligomers treated with bovine serum at various concentrations: TC-m-F (up) and TC-p-F (down).

Figure S7. The reference structure atom types and calculated RESP charges for each nucleoside: (a) thymidine, (b) 4AEomU and (c) 4AEopU.

$^1\text{H}$ -, and  $^{13}\text{C}$ -NMR spectra of compounds **4-14**,  $^{31}\text{P}$ -NMR spectra of compounds **9, 15** and  $^1\text{H}$  NOESY spectra of compound **6**.

| ONs       | Sequence <sup>a</sup>                                                                                | [M-H] <sup>-</sup> | m/z     |
|-----------|------------------------------------------------------------------------------------------------------|--------------------|---------|
| TC-Nat.   | 5'-TCT TTC TCT TTC CCT T-3'                                                                          | 4712.78            | 4713.77 |
| TC-m.     | 5'-TCT T <sub>m</sub> C TCT mTC CC <sub>m</sub> T-3'                                                 | 4979.92            | 4981.88 |
| TC-p.     | 5'-TCT T <sub>p</sub> C TCT pTC CC <sub>p</sub> T-3'                                                 | 5051.92            | 5052.90 |
| TC-mm-m   | 5'-TCT TTC mCT TTC CCT T-3'                                                                          | 4801.83            | 4802.91 |
| TC-mm-p   | 5'-TCT TTC pCT TTC CCT T-3'                                                                          | 4825.83            | 4827.02 |
| TC-Nat.-F | 5'-F-TCT TTC TCT TTC CCT T-3'                                                                        | 5250.91            | 5251.70 |
| TC-m-F    | 5'-F-TCT T <sub>m</sub> C TCT mTC CC <sub>m</sub> T-3'                                               | 5519.05            | 5519.09 |
| TC-p-F    | 5'-F-TCT T <sub>p</sub> C TCT pTC CC <sub>p</sub> T-3'                                               | 4712.78            | 4713.77 |
| KRAS-pos  | 5'- <u>G</u> · <u>C</u> · <u>T</u> ·A·T·T·A·G·G·A·G·T·C· <u>T</u> · <u>T</u> · <u>T</u> -3'          | 5321.49            | 5325.32 |
| KRAS-m-1  | 5'- <u>G</u> · <u>C</u> · <u>m</u> ·A·T·T·A·G·G·A·G·T·C· <u>T</u> · <u>T</u> · <u>T</u> -3'          | 5630.79            | 5634.80 |
| KRAS-m-2  | 5'- <u>G</u> · <u>C</u> · <u>T</u> ·A· <u>m</u> ·T·A·G·G·A·G·T·C· <u>T</u> · <u>T</u> · <u>T</u> -3' | 5459.61            | 5463.50 |
| KRAS-m-3  | 5'- <u>G</u> · <u>C</u> · <u>T</u> ·A·T·T·A·G·G·A·G· <u>m</u> ·C· <u>T</u> · <u>T</u> · <u>T</u> -3' | 5424.59            | 5428.48 |
| KRAS-m-4  | 5'- <u>G</u> · <u>C</u> · <u>T</u> ·A·T·T·A·G·G·A·G·T·C· <u>m</u> · <u>T</u> · <u>T</u> -3'          | 5367.53            | 5371.38 |
| KRAS-p-1  | 5'- <u>G</u> · <u>C</u> · <u>p</u> ·A·T·T·A·G·G·A·G·T·C· <u>T</u> · <u>T</u> · <u>T</u> -3'          | 5424.59            | 5429.21 |
| KRAS-p-2  | 5'- <u>G</u> · <u>C</u> · <u>T</u> ·A· <u>p</u> ·T·A·G·G·A·G·T·C· <u>T</u> · <u>T</u> · <u>T</u> -3' | 5367.53            | 5371.49 |
| KRAS-p-3  | 5'- <u>G</u> · <u>C</u> · <u>T</u> ·A·T·T·A·G·G·A·G· <u>p</u> ·C· <u>T</u> · <u>T</u> · <u>T</u> -3' | 5424.59            | 5427.11 |
| KRAS-p-4  | 5'- <u>G</u> · <u>C</u> · <u>T</u> ·A·T·T·A·G·G·A·G·T·C· <u>p</u> · <u>T</u> · <u>T</u> -3'          | 5367.53            | 5372.01 |
| cRNA1     | 5'-aag gga aag aga aag a-3'                                                                          | 5298.86            | 5300.66 |
| cRNA2     | 5'-F-aag gga aag aga aag a-3'                                                                        | 5836.99            | 5837.57 |

**Table 1. The sequences of all oligonucleotides used in this study.**

<sup>a</sup>Capital letters denote DNAs while small letters denote RNAs. The red m and p denote the 4'-C- $\alpha$ -aminoethoxy-2'-O-methyl-5-methyl-uridine (4AEo<sup>m</sup>U) and the 4'-C- $\alpha$ -aminoethoxy-2'-O-methyl-5-propynyl-uridine (4AEo<sup>p</sup>U), respectively. Underlined letters denote LNAs. F denote fluorescein. Black dots denote the phosphorothioate (PS) linkages. The cRNAs for base-mismatching test were prepared in previous study [32].

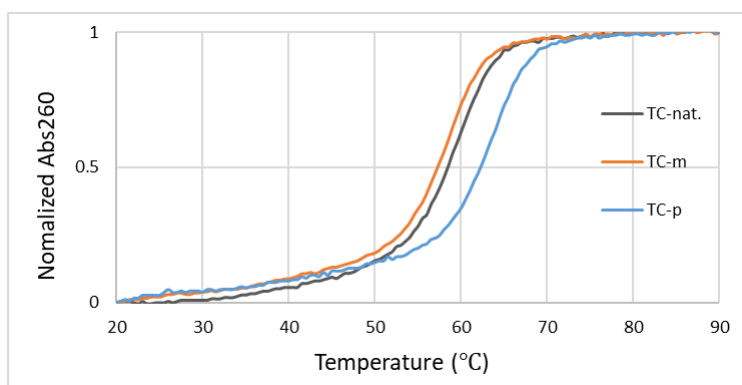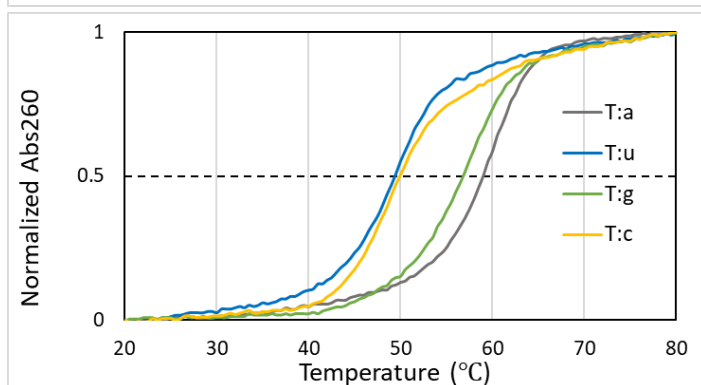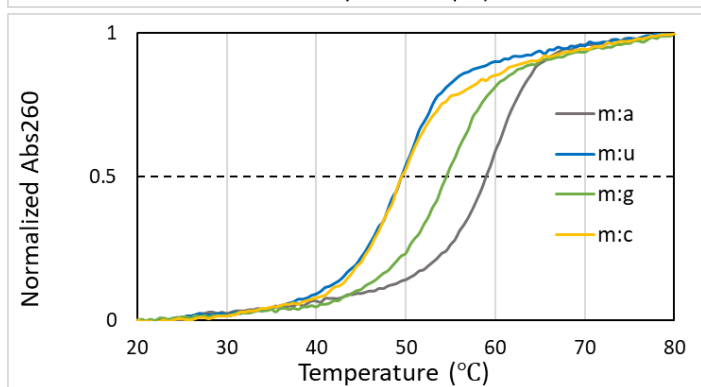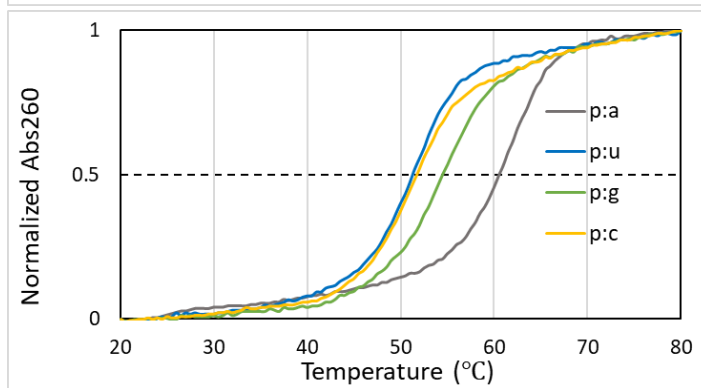

**Figure S1. The UV melting profiles of DNA/RNA duplexes in this study.**

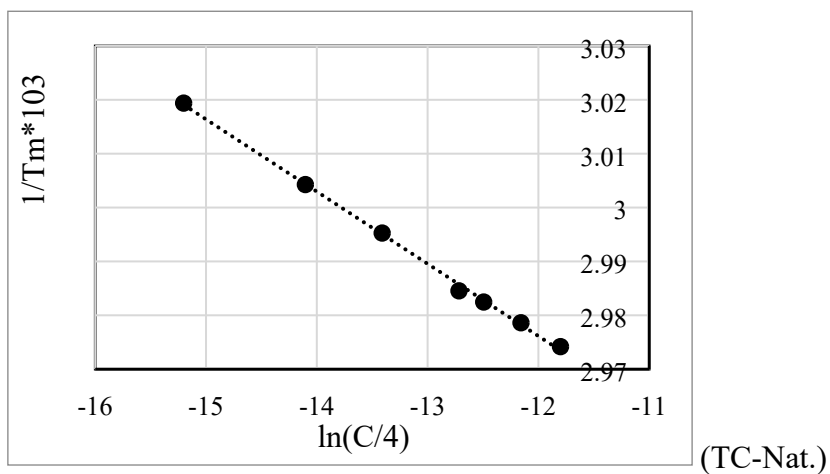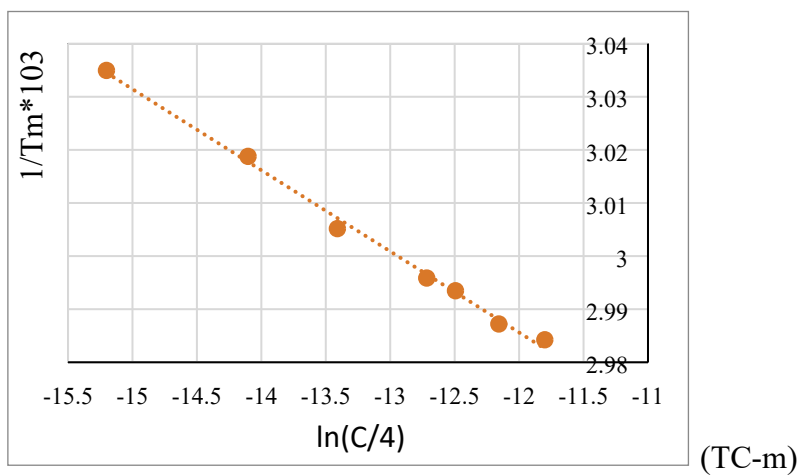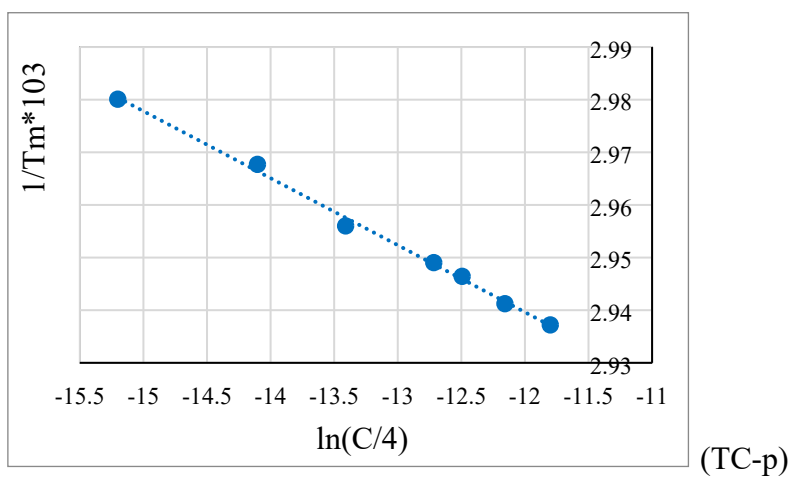

**Figure S2. The graphical data of  $1/T_m$  vs  $\ln(C_T/4)$  plots.**

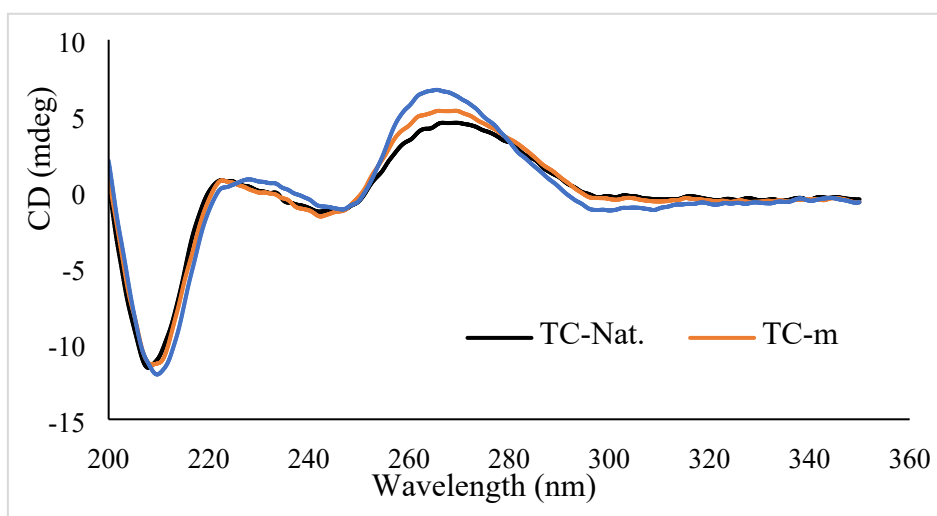

**Figure S3. CD spectrum of DNA/RNA duplexes in this study.**

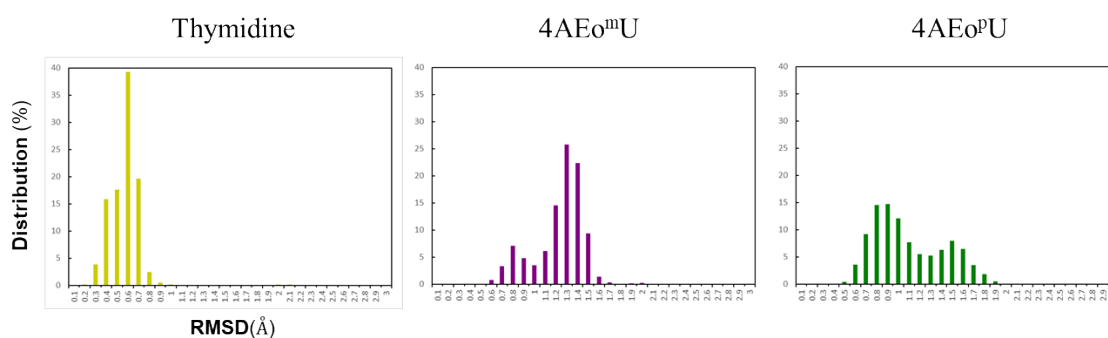

**Figure S4. The changes of time-dependent RMSD (Å) of each nucleoside.**

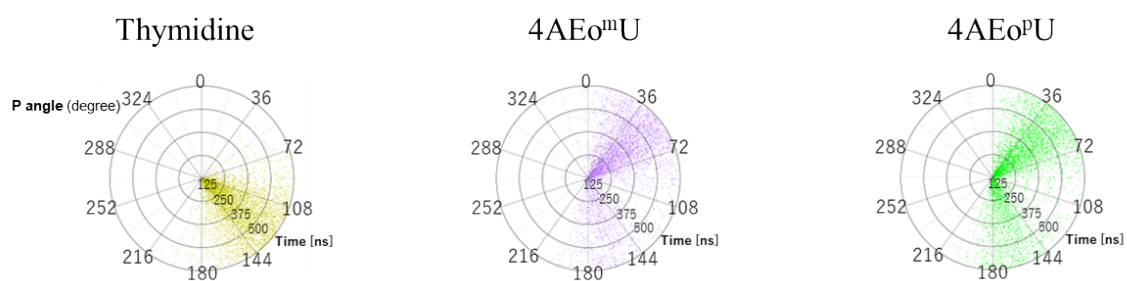

**Figure S5. Pseudorotational phase angle ( $P$ ) of each nucleoside.**

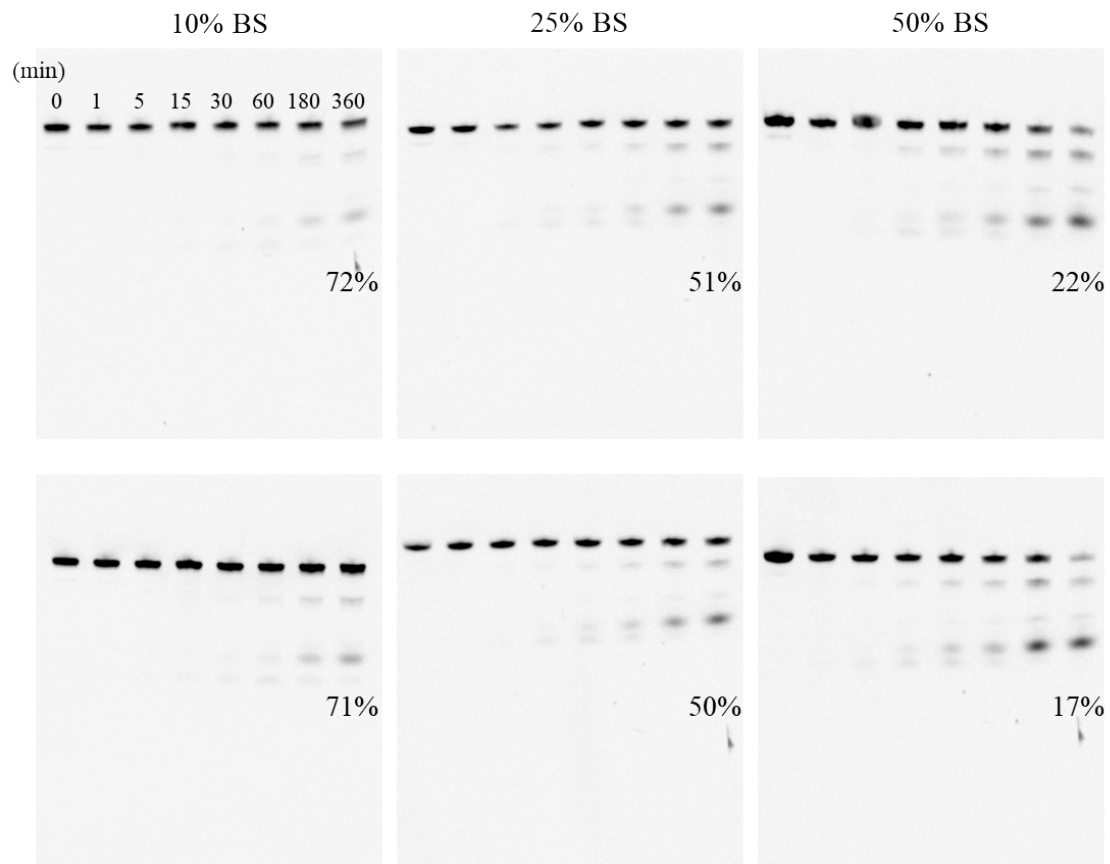

**Figure S6. PAGE analysis of single-stranded oligomers treated with bovine serum at various concentrations: TC-m-F (up) and TC-p-F (down).**

(a)Thymidine

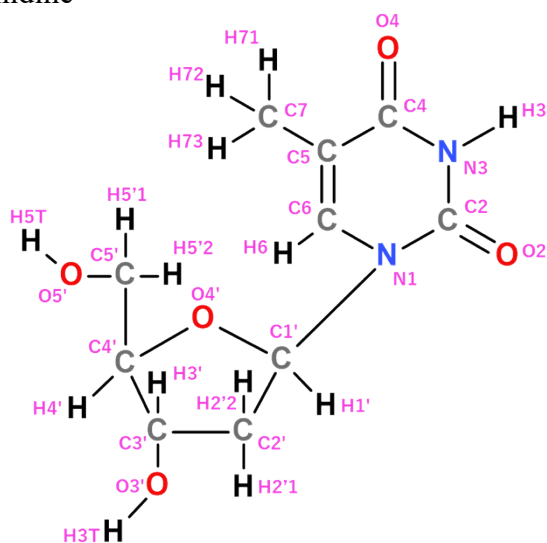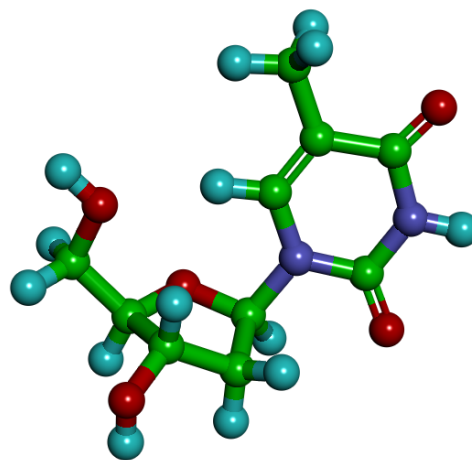

| Atom name | Atom type | RESP charge | Atom name | Atom type | RESP charge |
|-----------|-----------|-------------|-----------|-----------|-------------|
| O2        | o         | -0.632498   | H3T       | ho        | 0.425732    |
| C2        | c         | 0.793243    | H3'       | h1        | 0.046292    |
| N3        | n         | -0.726469   | C4'       | c3        | 0.187230    |
| H3        | hn        | 0.397873    | H4'       | h1        | 0.007755    |
| C4        | c         | 0.771164    | C5'       | c3        | 0.115366    |
| O4        | o         | -0.597090   | H5'1      | h1        | 0.045585    |
| C5        | cd        | -0.070669   | H5'2      | h1        | 0.045585    |
| C7        | c3        | -0.329531   | O5'       | oh        | -0.703396   |
| H71       | hc        | 0.105895    | H5T       | ho        | 0.463505    |
| H72       | hc        | 0.105895    |           |           |             |
| H73       | hc        | 0.105895    |           |           |             |
| C6        | cc        | -0.192145   |           |           |             |
| H6        | h4        | 0.265353    |           |           |             |
| N1        | n         | -0.200708   |           |           |             |
| C1'       | c3        | 0.414366    |           |           |             |
| O4'       | os        | -0.478007   |           |           |             |
| H1'       | h2        | 0.056209    |           |           |             |
| C2'       | c3        | -0.463805   |           |           |             |
| H2'1      | hc        | 0.129227    |           |           |             |
| H2'2      | hc        | 0.129227    |           |           |             |
| C3'       | c3        | 0.526271    |           |           |             |
| O3'       | oh        | -0.743351   |           |           |             |



(b) 4AEo<sup>m</sup>U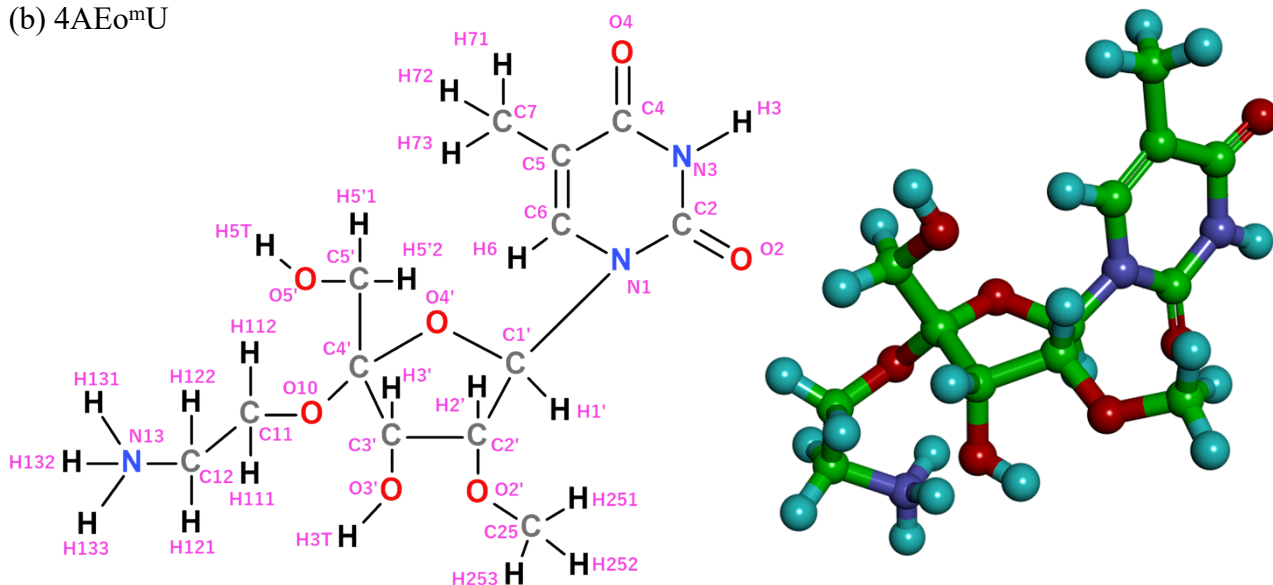

| Atom name | Atom type | RESP charge | Atom name | Atom type | RESP charge |
|-----------|-----------|-------------|-----------|-----------|-------------|
| O2        | o         | -0.627573   | C3'       | c3        | 0.194429    |
| C2        | c         | 0.814088    | O3'       | oh        | -0.655476   |
| N3        | n         | -0.743745   | H3T       | ho        | 0.422985    |
| H3        | hn        | 0.411288    | H3'       | h1        | 0.099814    |
| C4        | c         | 0.774280    | C4'       | c3        | 0.397484    |
| O4        | o         | -0.560321   | C5'       | c3        | 0.071495    |
| C5        | cd        | -0.029080   | O5'       | oh        | -0.760414   |
| C7        | c3        | -0.383170   | H5T       | ho        | 0.501195    |
| H71       | hc        | 0.131254    | H5'1      | h1        | 0.089834    |
| H72       | hc        | 0.131254    | H5'2      | h1        | 0.089834    |
| H73       | hc        | 0.131254    | O10       | os        | -0.423908   |
| C6        | cc        | -0.262349   | C11       | c3        | 0.218866    |
| H6        | h4        | 0.267977    | H111      | h1        | 0.026149    |
| N1        | n         | -0.134063   | H112      | h1        | 0.026149    |
| C1'       | c3        | 0.277225    | C12       | c3        | -0.001046   |
| O4'       | os        | -0.421061   | H121      | hx        | 0.108387    |
| H1'       | h2        | 0.095923    | H122      | hx        | 0.108387    |
| C2'       | c3        | -0.052774   | N13       | n4        | -0.364088   |
| O2'       | os        | -0.333044   | H131      | hn        | 0.329086    |
| C25       | c3        | -0.044824   | H132      | hn        | 0.329086    |
| H251      | h1        | 0.088272    | H133      | hn        | 0.329086    |

|      |    |          |
|------|----|----------|
| H252 | h1 | 0.088272 |
| H253 | h1 | 0.088272 |
| H2'  | h1 | 0.155314 |

(c) 4AEo<sup>p</sup>U

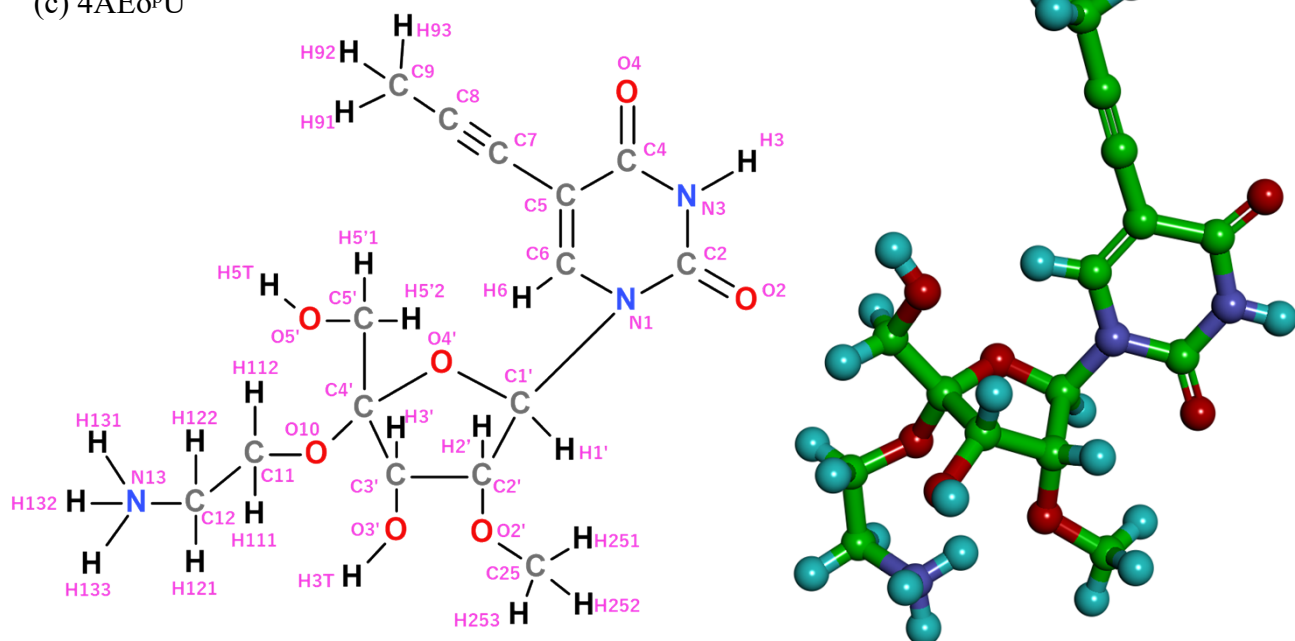

| Atom name | Atom type | RESP charge | Atom name | Atom type | RESP charge |
|-----------|-----------|-------------|-----------|-----------|-------------|
| C9        | c3        | -0.265152   | H253      | h1        | 0.140156    |
| H91       | hc        | 0.114692    | H2'       | h1        | 0.146678    |
| H92       | hc        | 0.114692    | C3'       | c3        | 0.377801    |
| H93       | hc        | 0.114692    | O3'       | oh        | -0.705015   |
| C8        | c1        | 0.154207    | H3T       | ho        | 0.463512    |
| C7        | ch        | -0.402377   | H3'       | h1        | 0.053246    |
| C5        | cd        | 0.033503    | C4'       | c3        | 0.298573    |
| C6        | cc        | -0.108650   | C5'       | c3        | 0.131048    |
| H6        | h4        | 0.239967    | O5'       | oh        | -0.691739   |
| C4        | c         | 0.793449    | H5T       | ho        | 0.470579    |
| O4        | o         | -0.546271   | H5'1      | h1        | 0.071127    |
| N3        | n         | -0.781446   | H5'2      | h1        | 0.071127    |
| H3        | hn        | 0.426030    | O10       | os        | -0.383798   |
| C2        | c         | 0.810720    | C11       | c3        | 0.265775    |
| O2        | o         | -0.632116   | H111      | h1        | 0.016884    |
| N1        | n         | -0.187852   | H112      | h1        | 0.016884    |

|      |    |           |      |    |           |
|------|----|-----------|------|----|-----------|
| C1'  | c3 | 0.233131  | C12  | c3 | -0.086019 |
| O4'  | os | -0.385815 | H121 | hx | 0.127501  |
| H1'  | h2 | 0.141355  | H122 | hx | 0.127501  |
| C2'  | c3 | -0.152767 | N13  | n4 | -0.324466 |
| O2'  | os | -0.294486 | H131 | hn | 0.307884  |
| C25  | c3 | -0.210827 | H132 | hn | 0.307884  |
| H251 | h1 | 0.140156  | H133 | hn | 0.307884  |
| H252 | h1 | 0.140156  |      |    |           |

---

**Figure S7. The reference structure atom types and calculated RESP charges for each nucleoside: (a) thymidine, (b) 4AEomU and (c) 4AEopU.**

<sup>1</sup>H NMR spectrum of compound 4

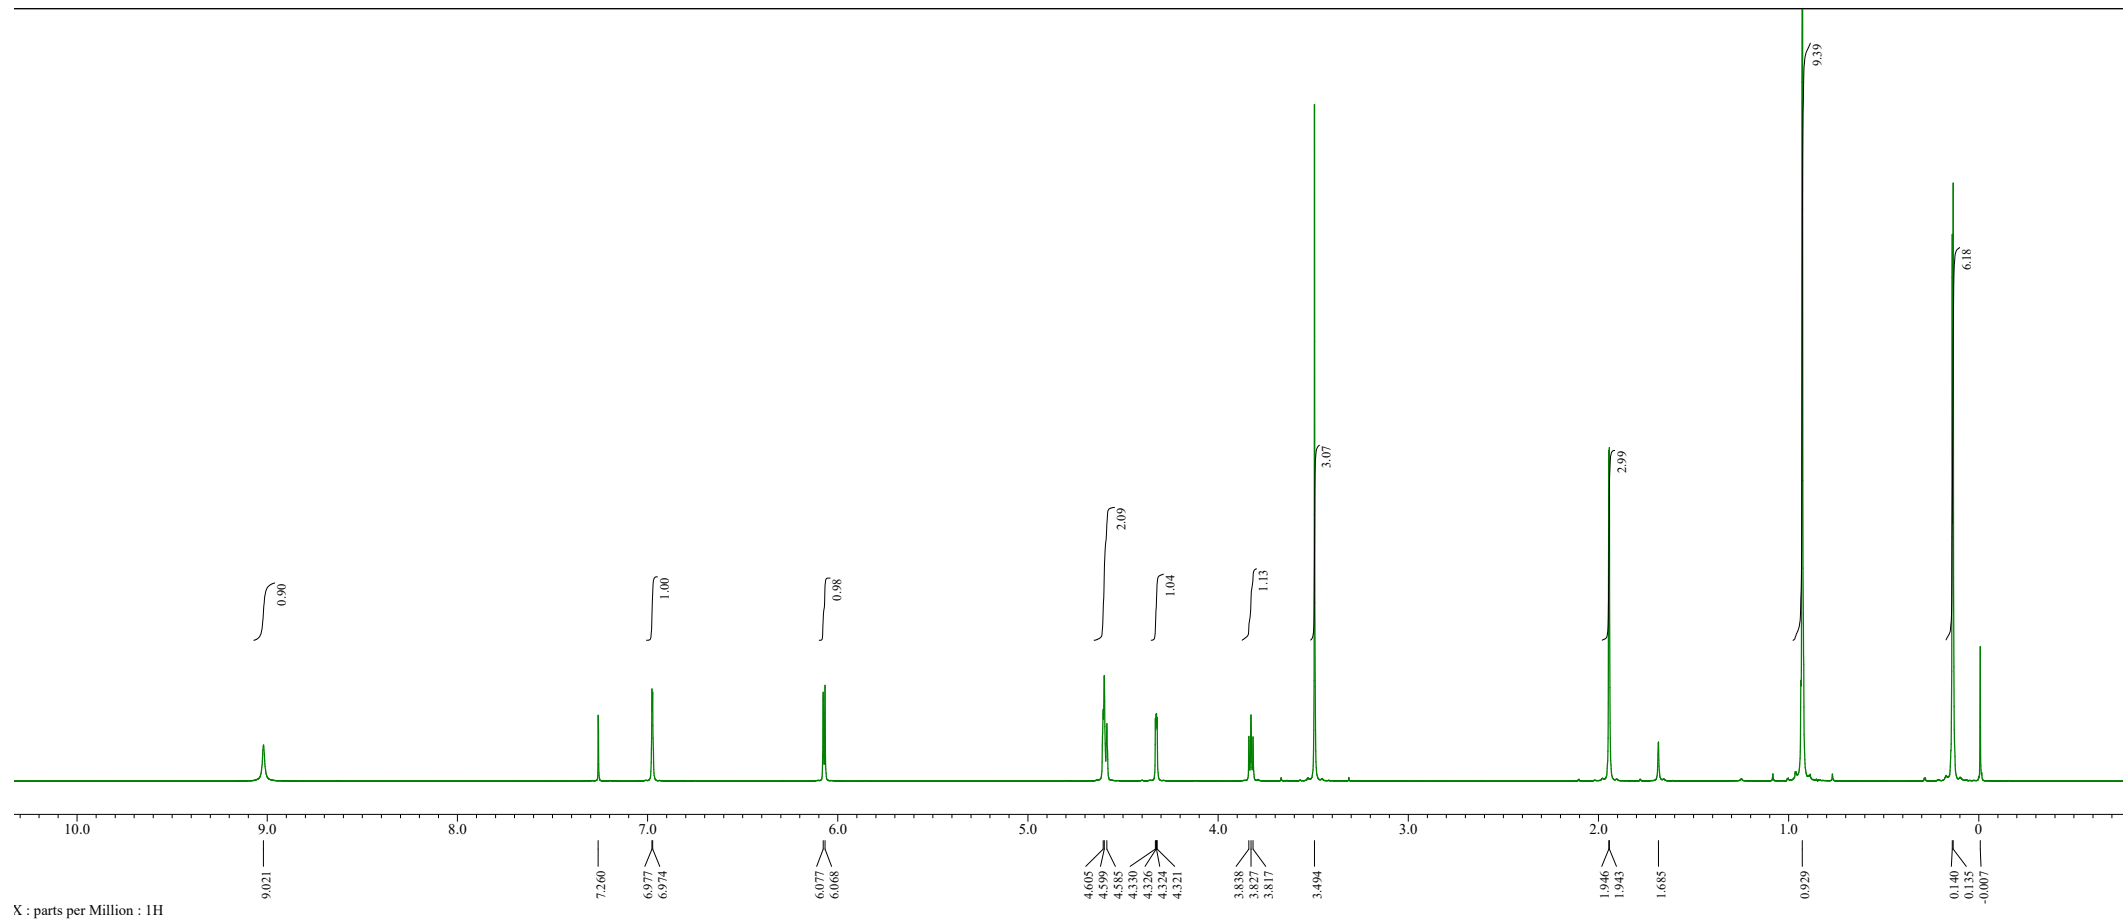

$^{13}\text{C}$  NMR spectrum of compound **4**

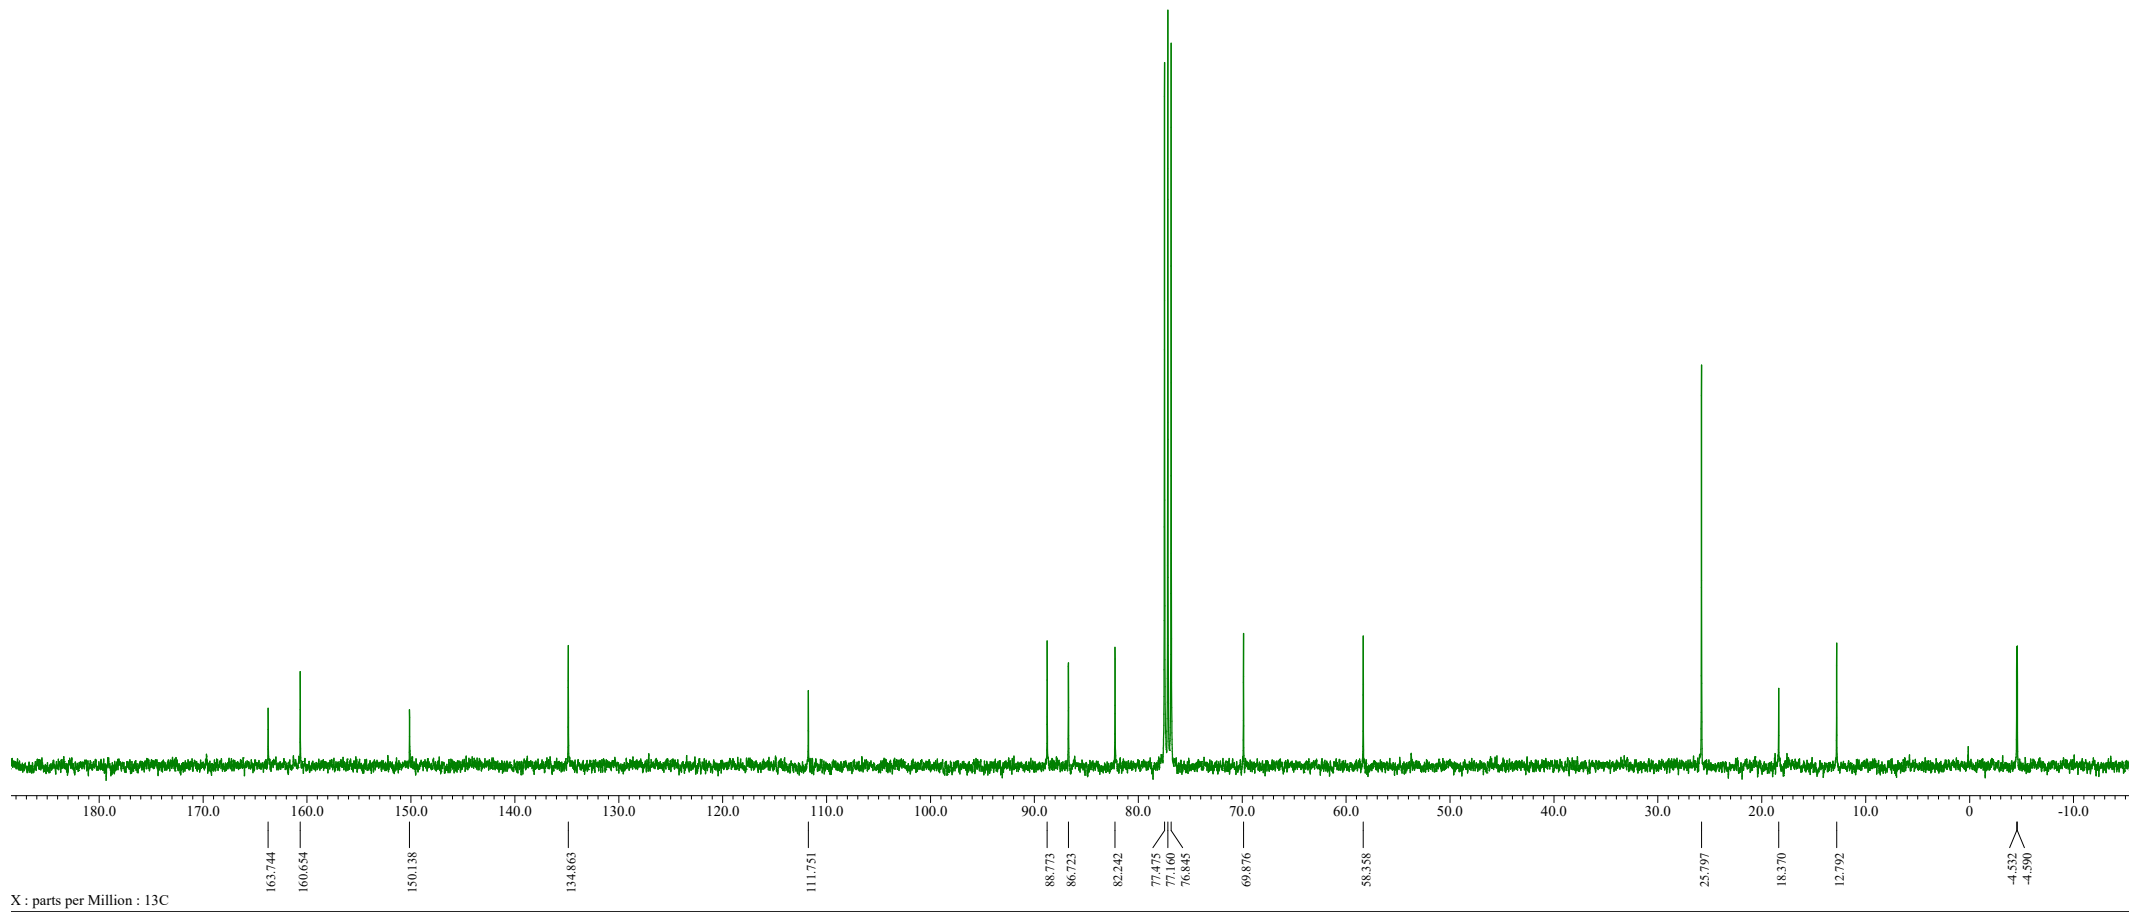

X : parts per Million : 13C

<sup>1</sup>H NMR spectrum of compound **6**

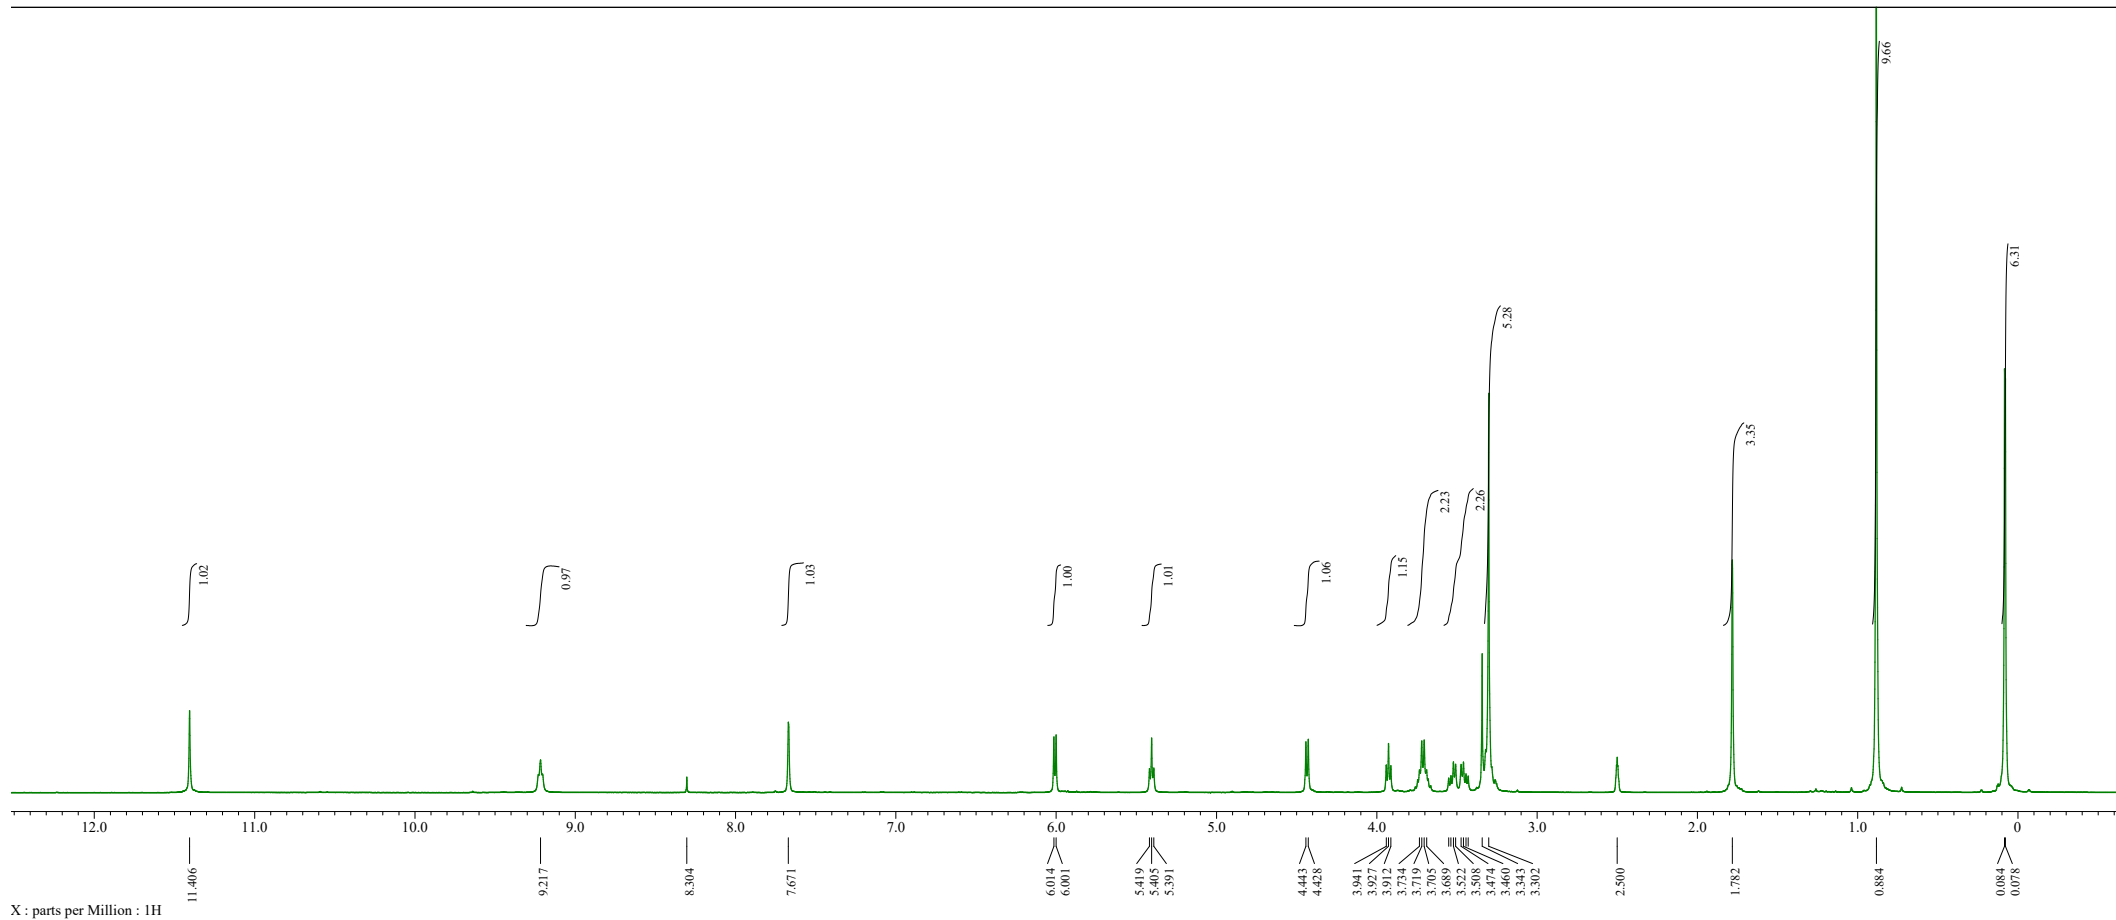

<sup>13</sup>C NMR spectrum of compound **6**

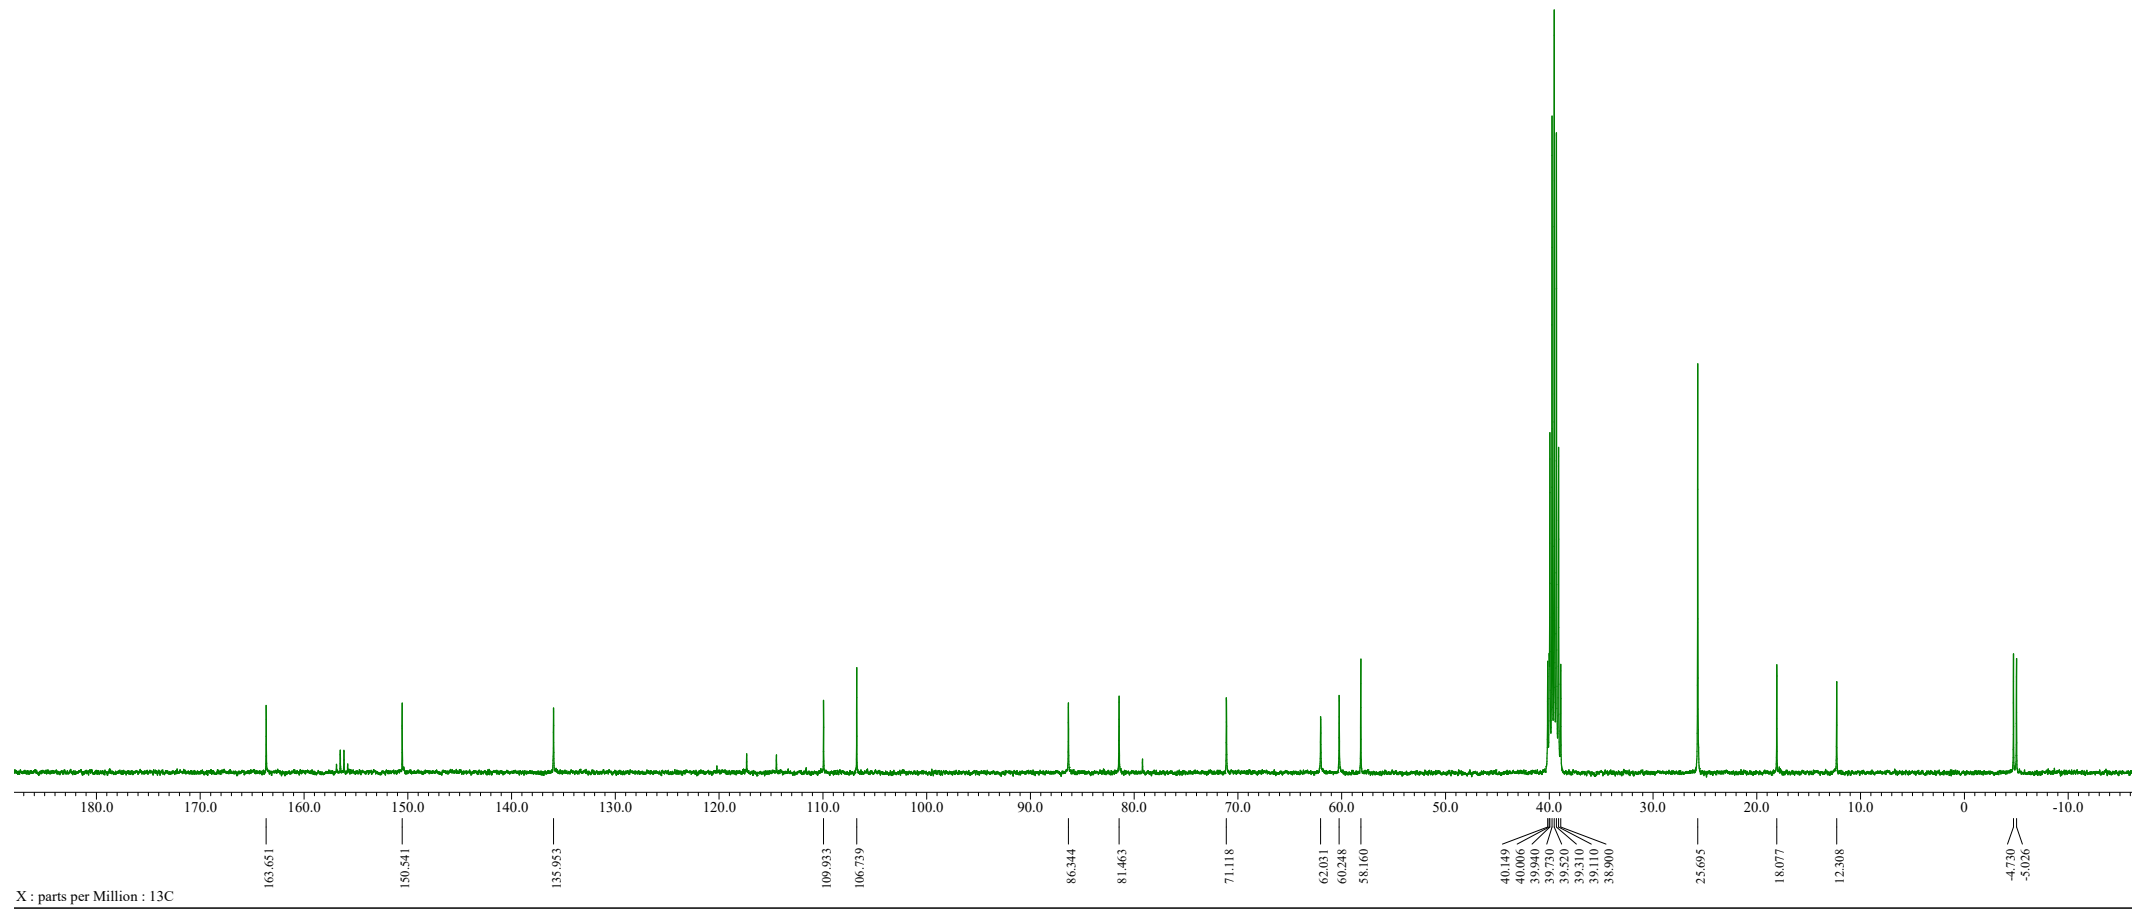

<sup>1</sup>H NMR spectrum of compound 7

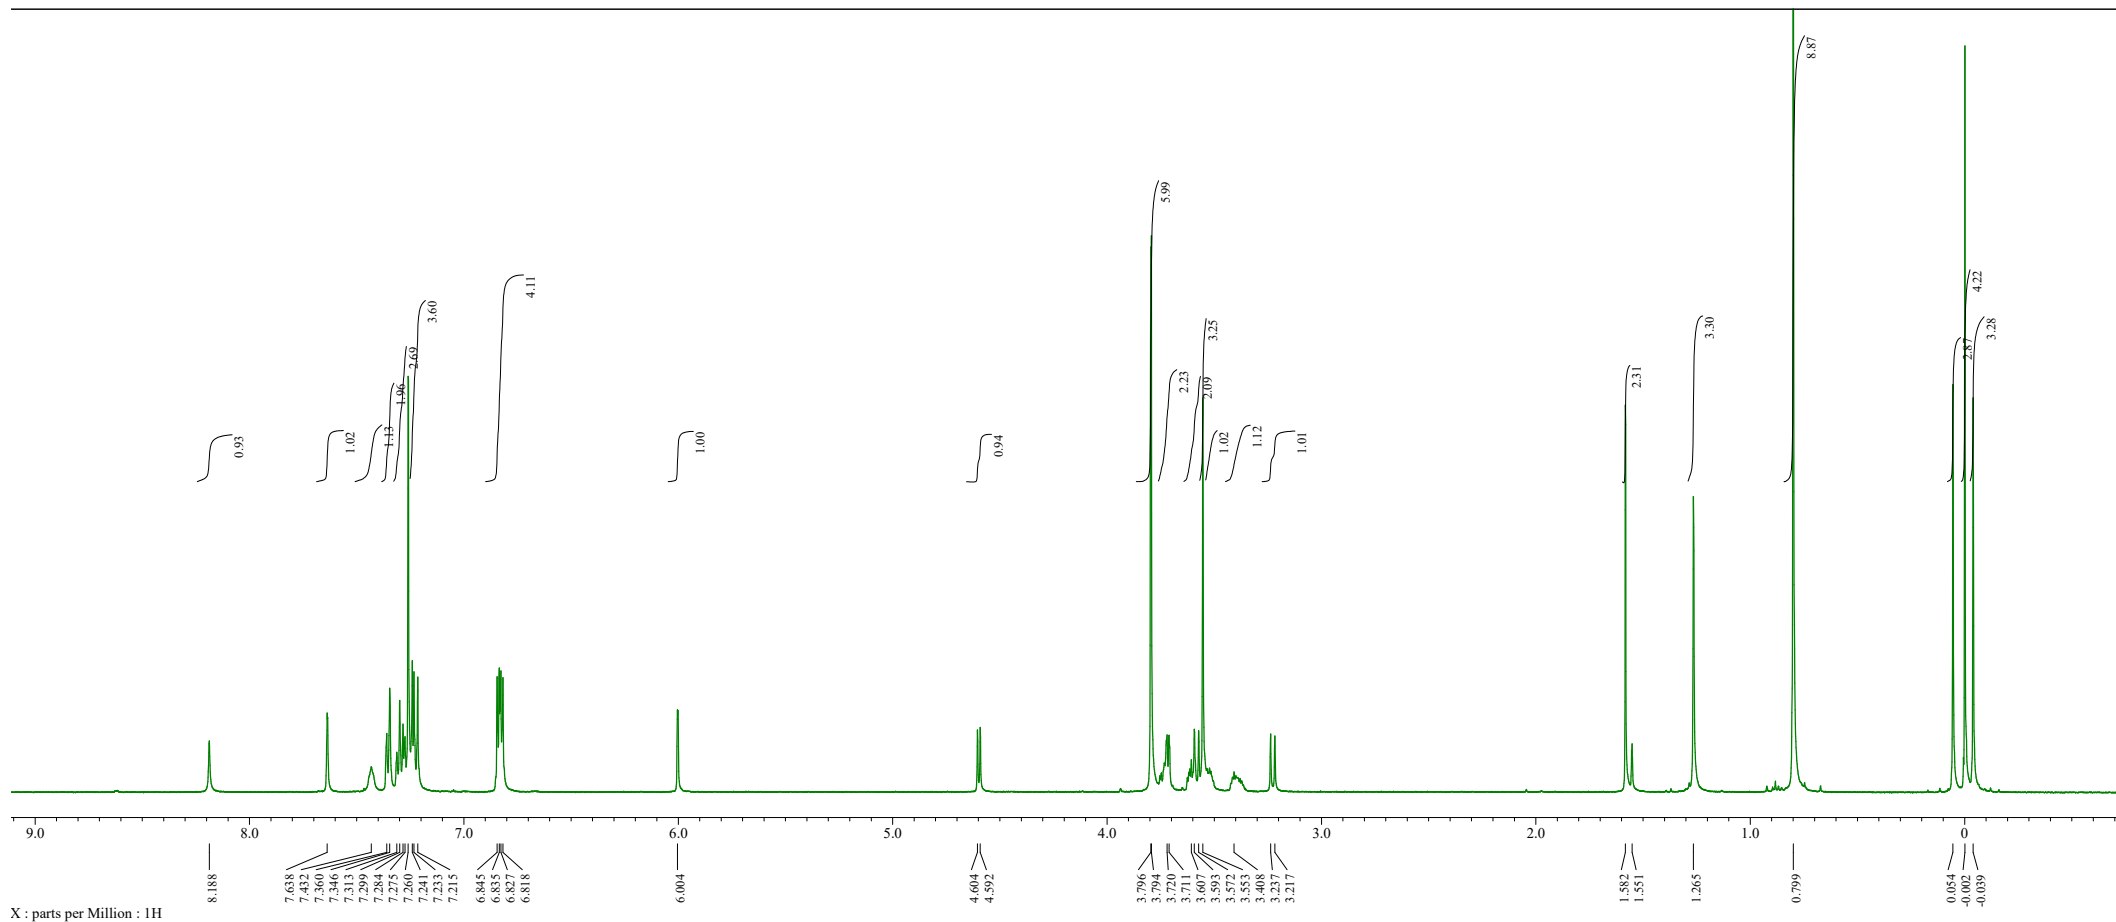



<sup>13</sup>C NMR spectrum of compound 7

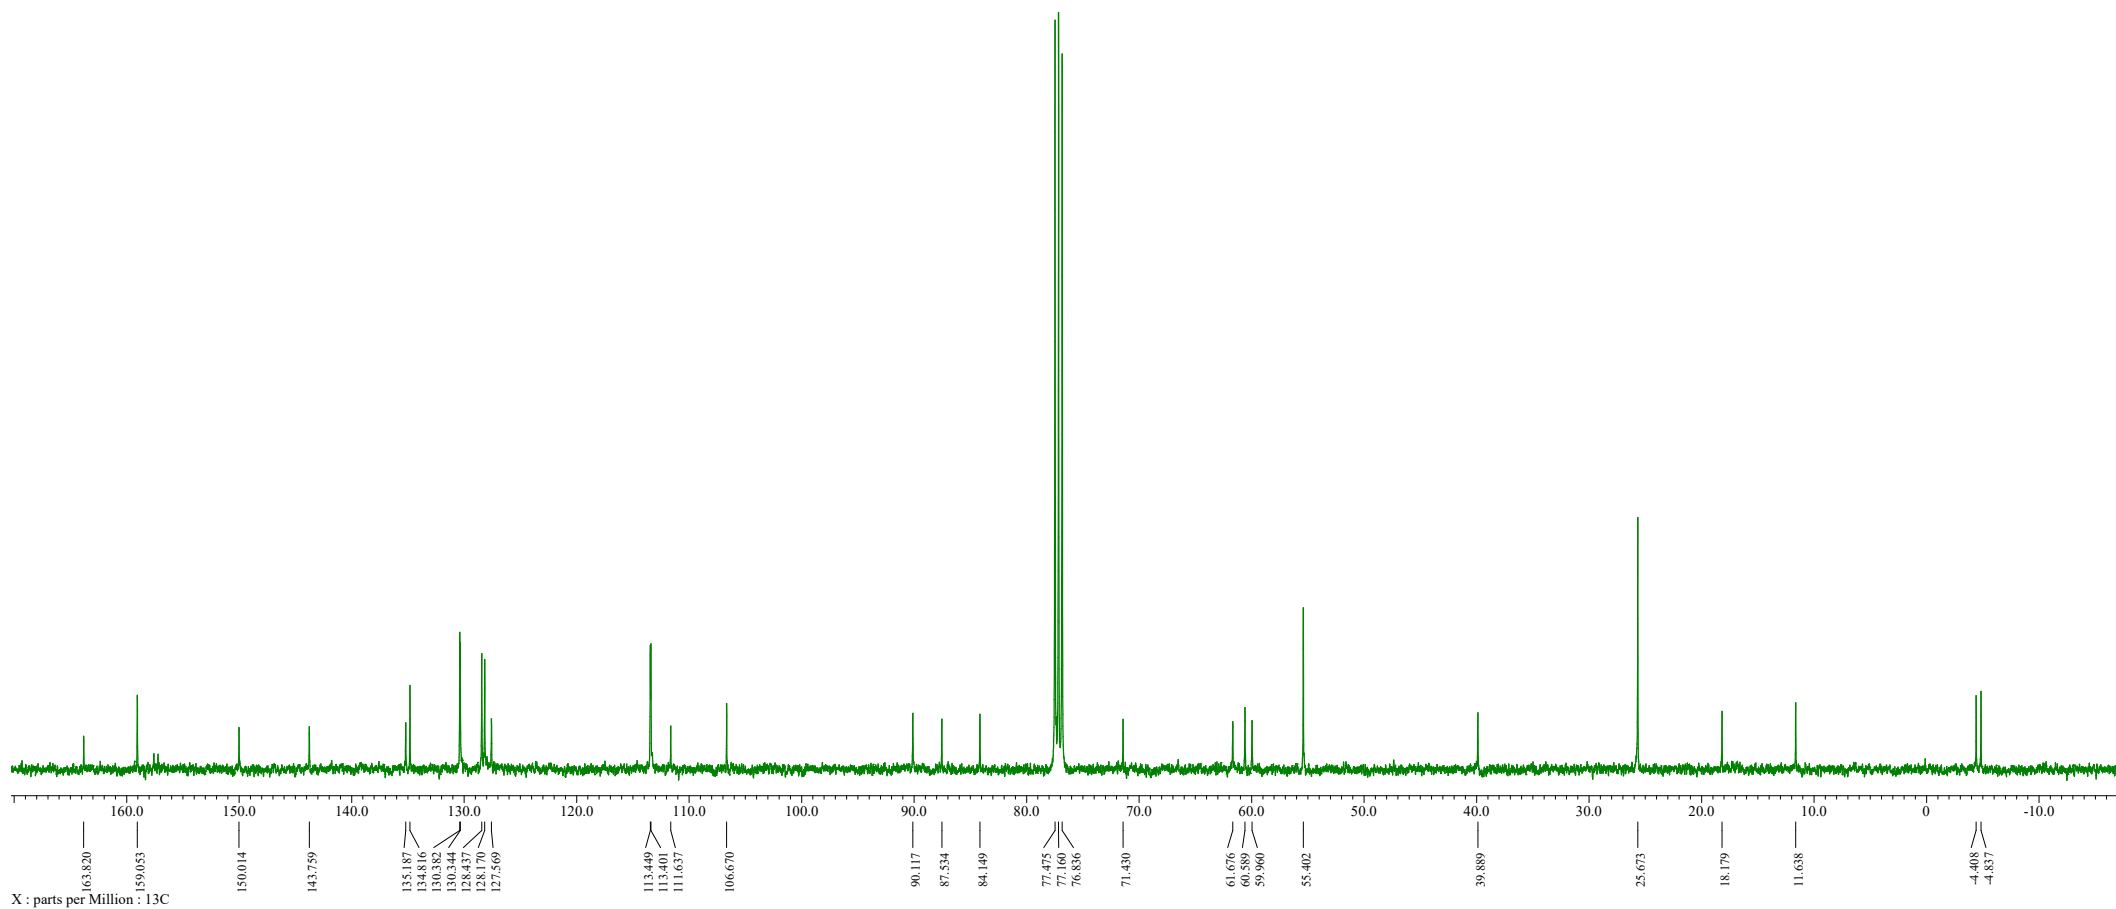

X : parts per Million : 13C

<sup>1</sup>H NMR spectrum of compound **8**

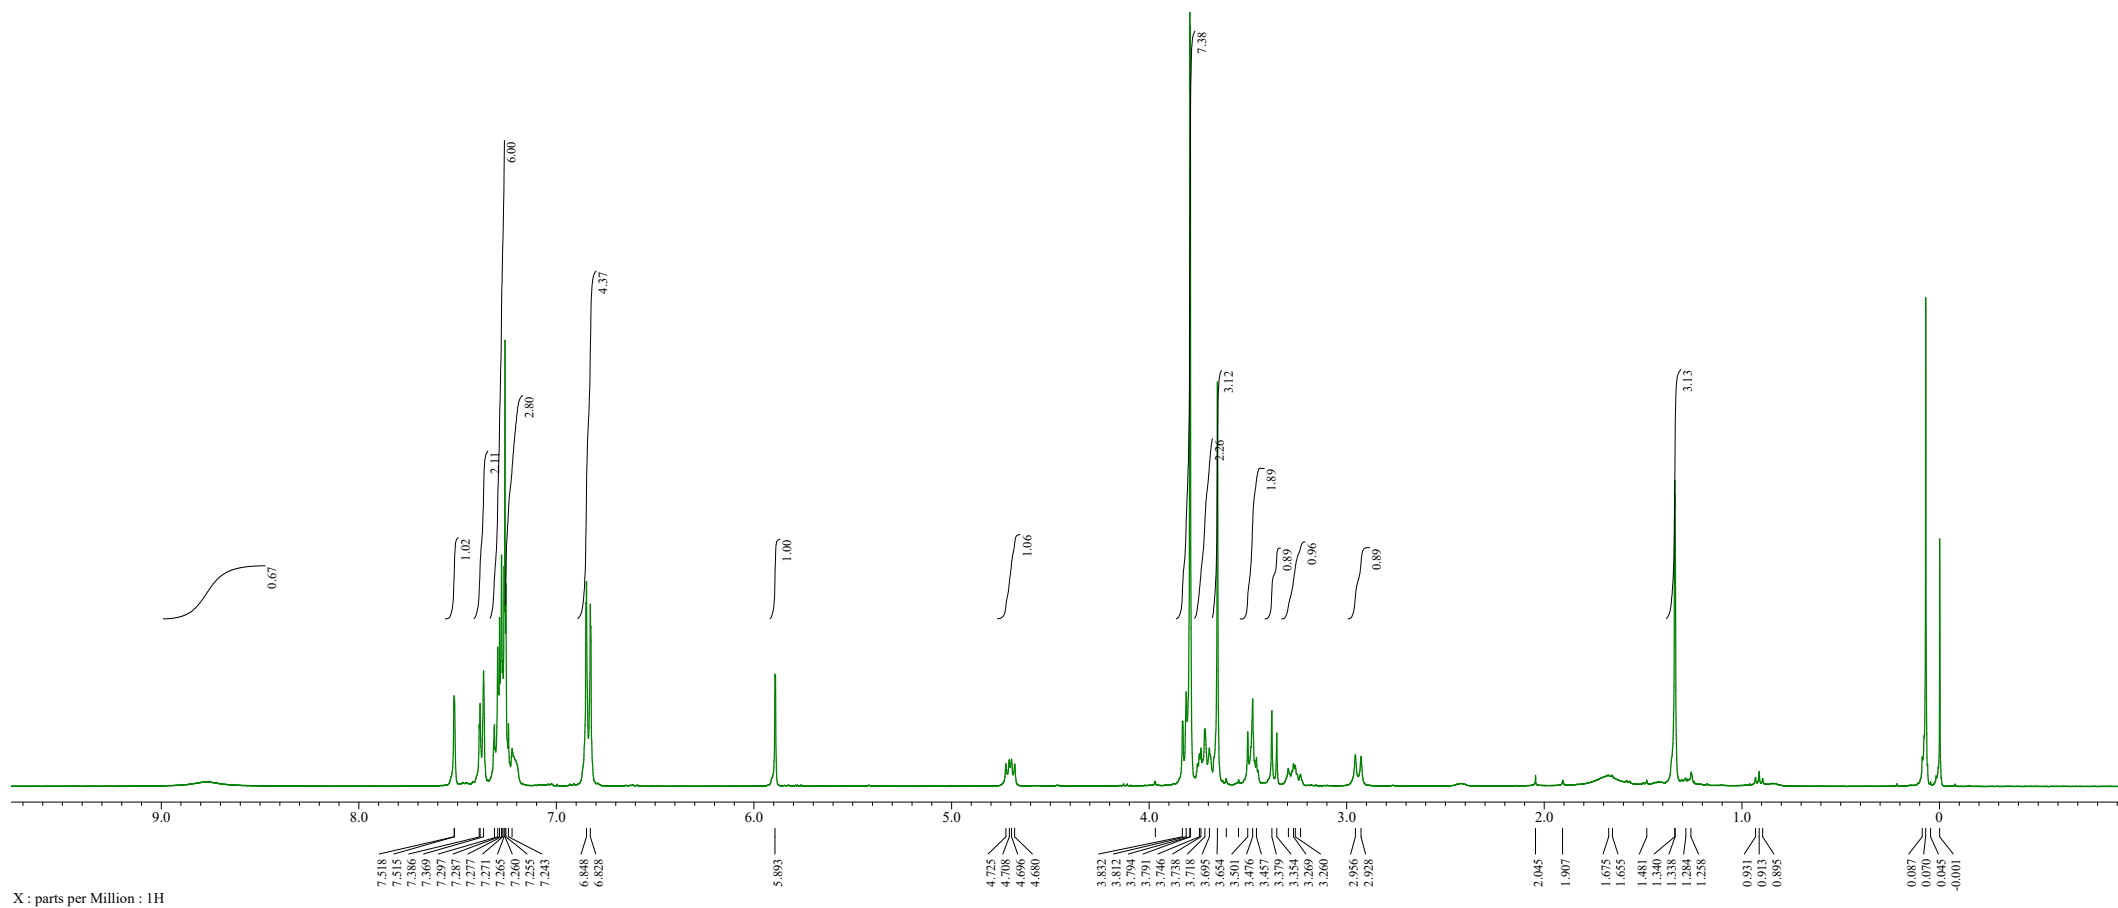

$^{13}\text{C}$  NMR spectrum of compound **8**

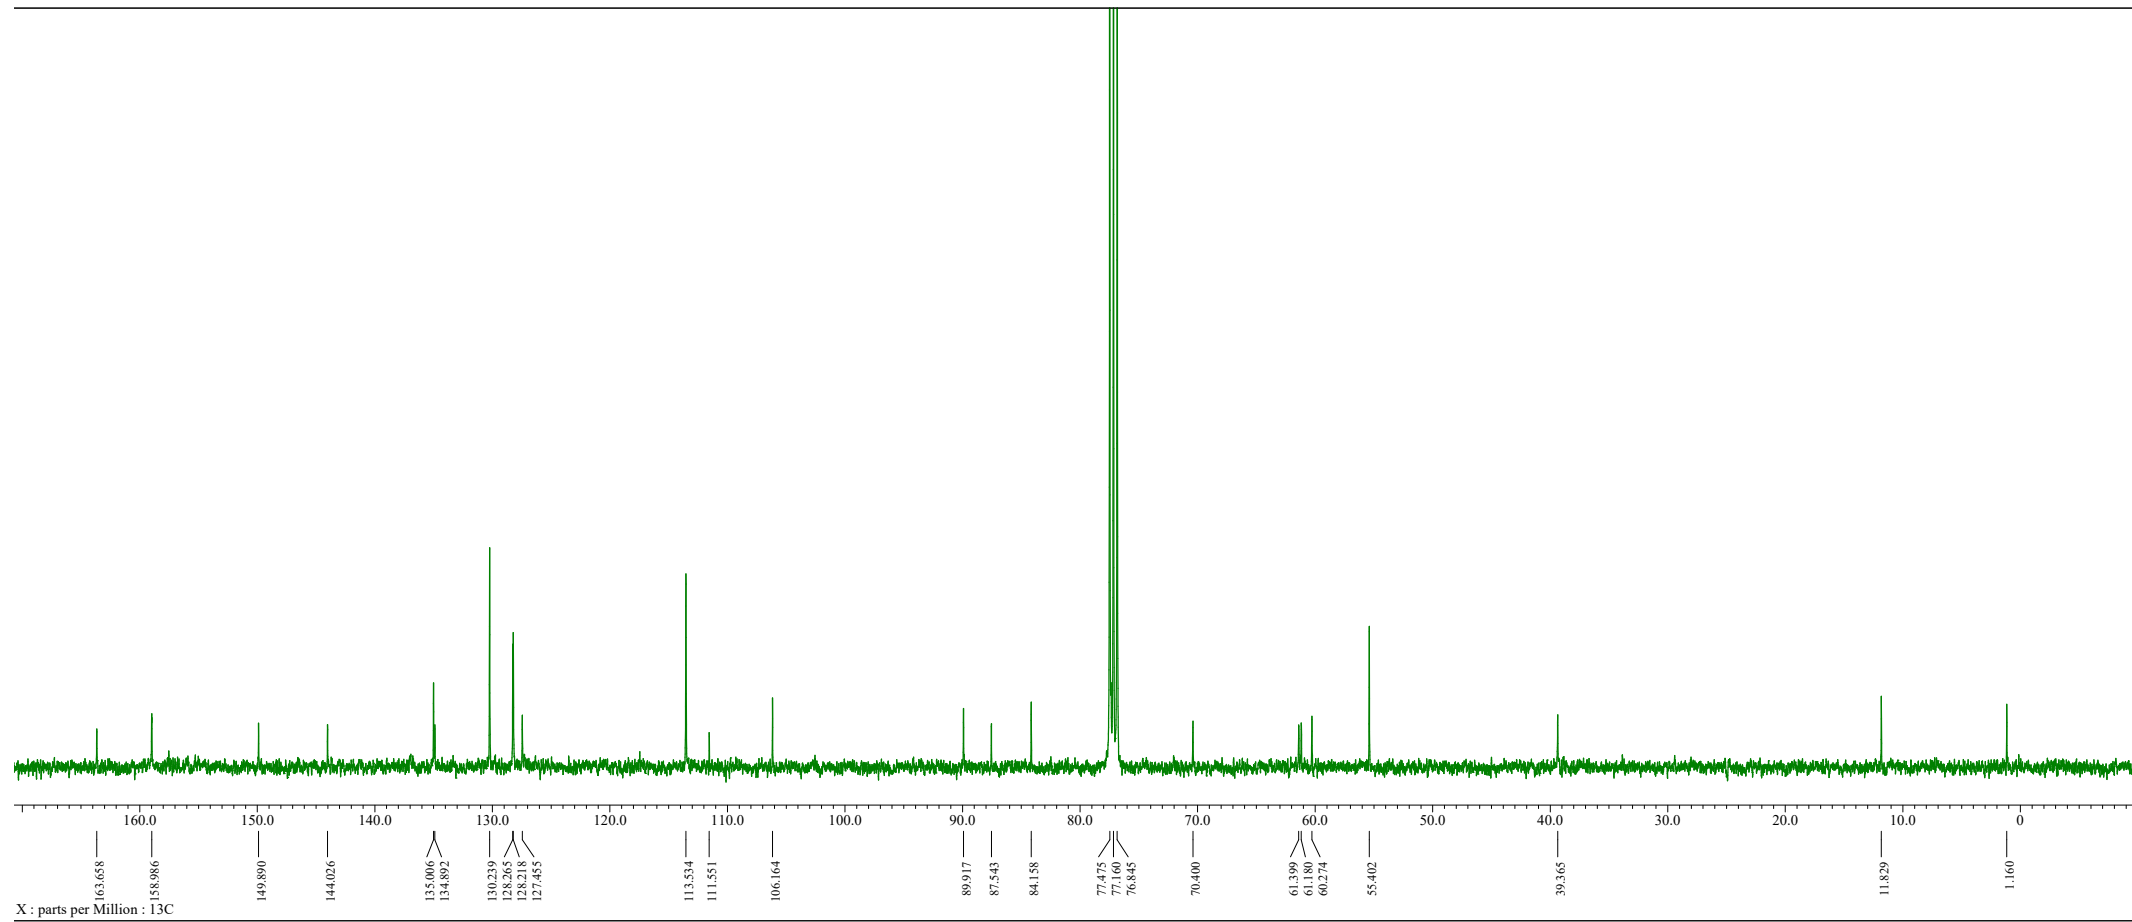

$^{31}\text{P}$  NMR spectrum of compound **9**

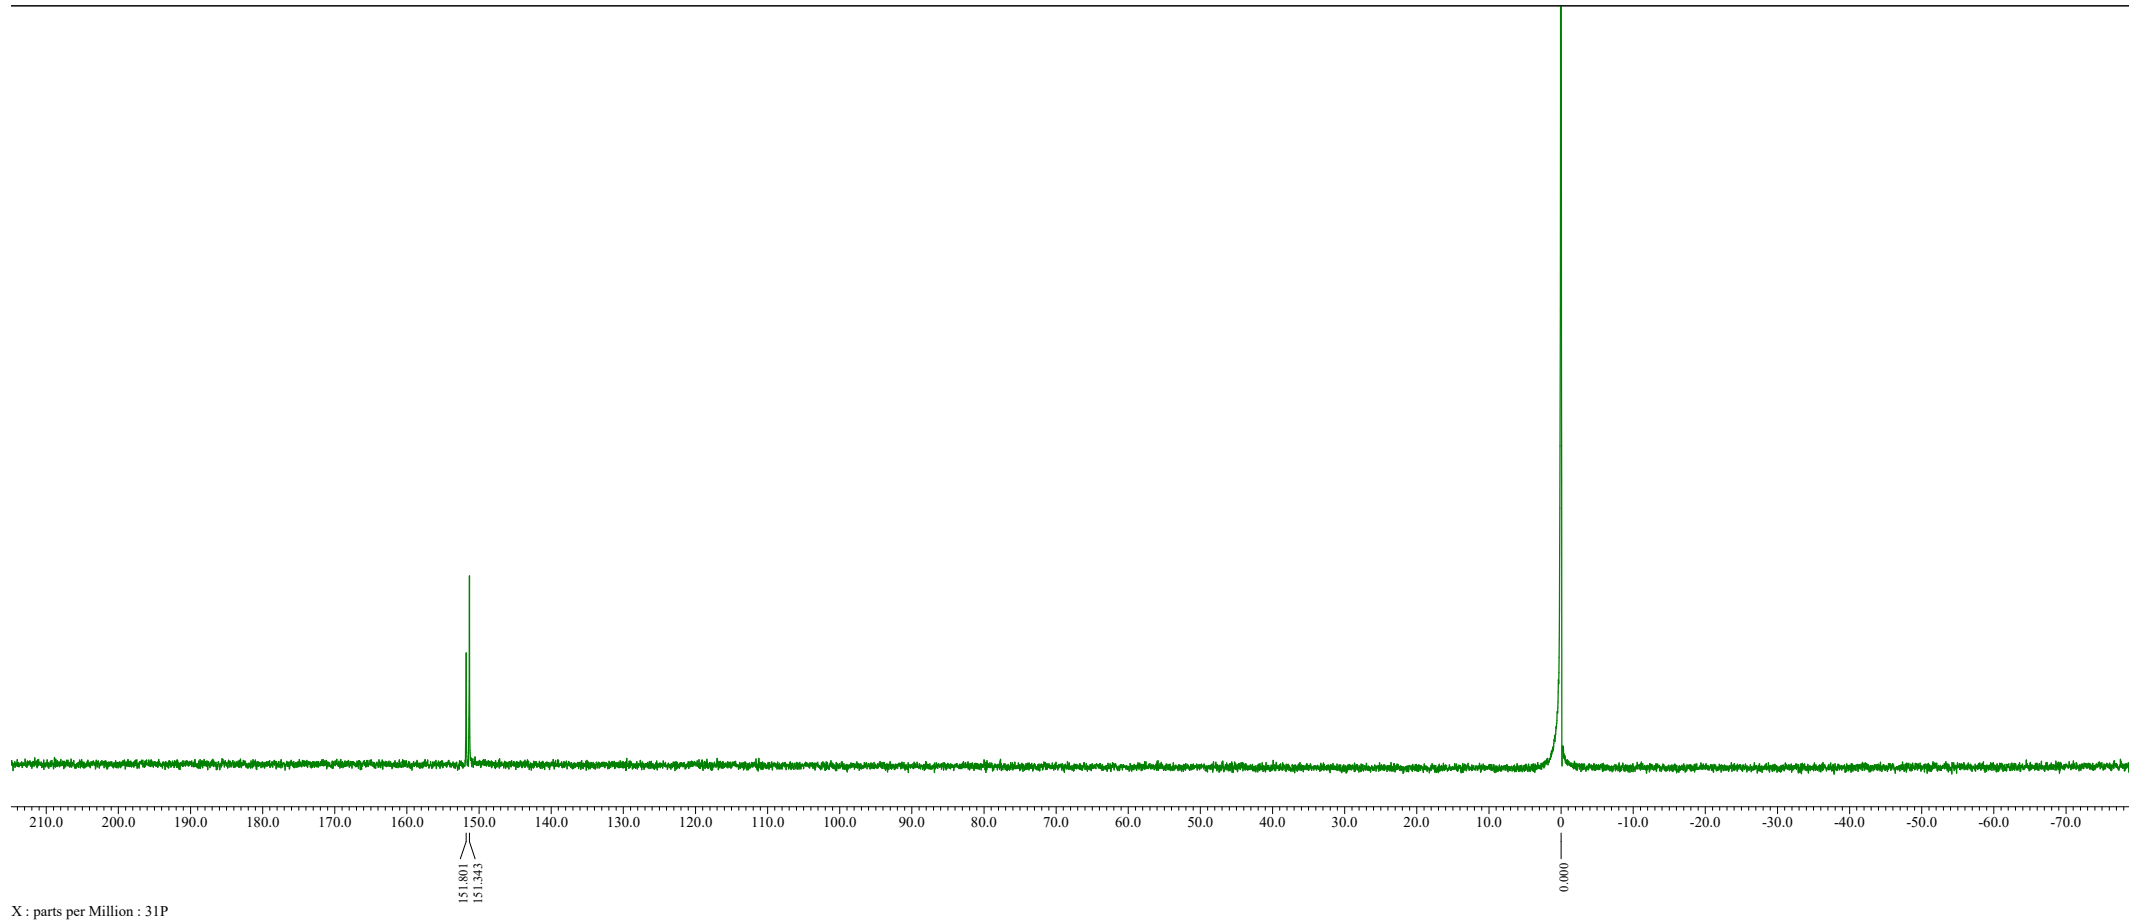

<sup>1</sup>H NMR spectrum of compound **11**

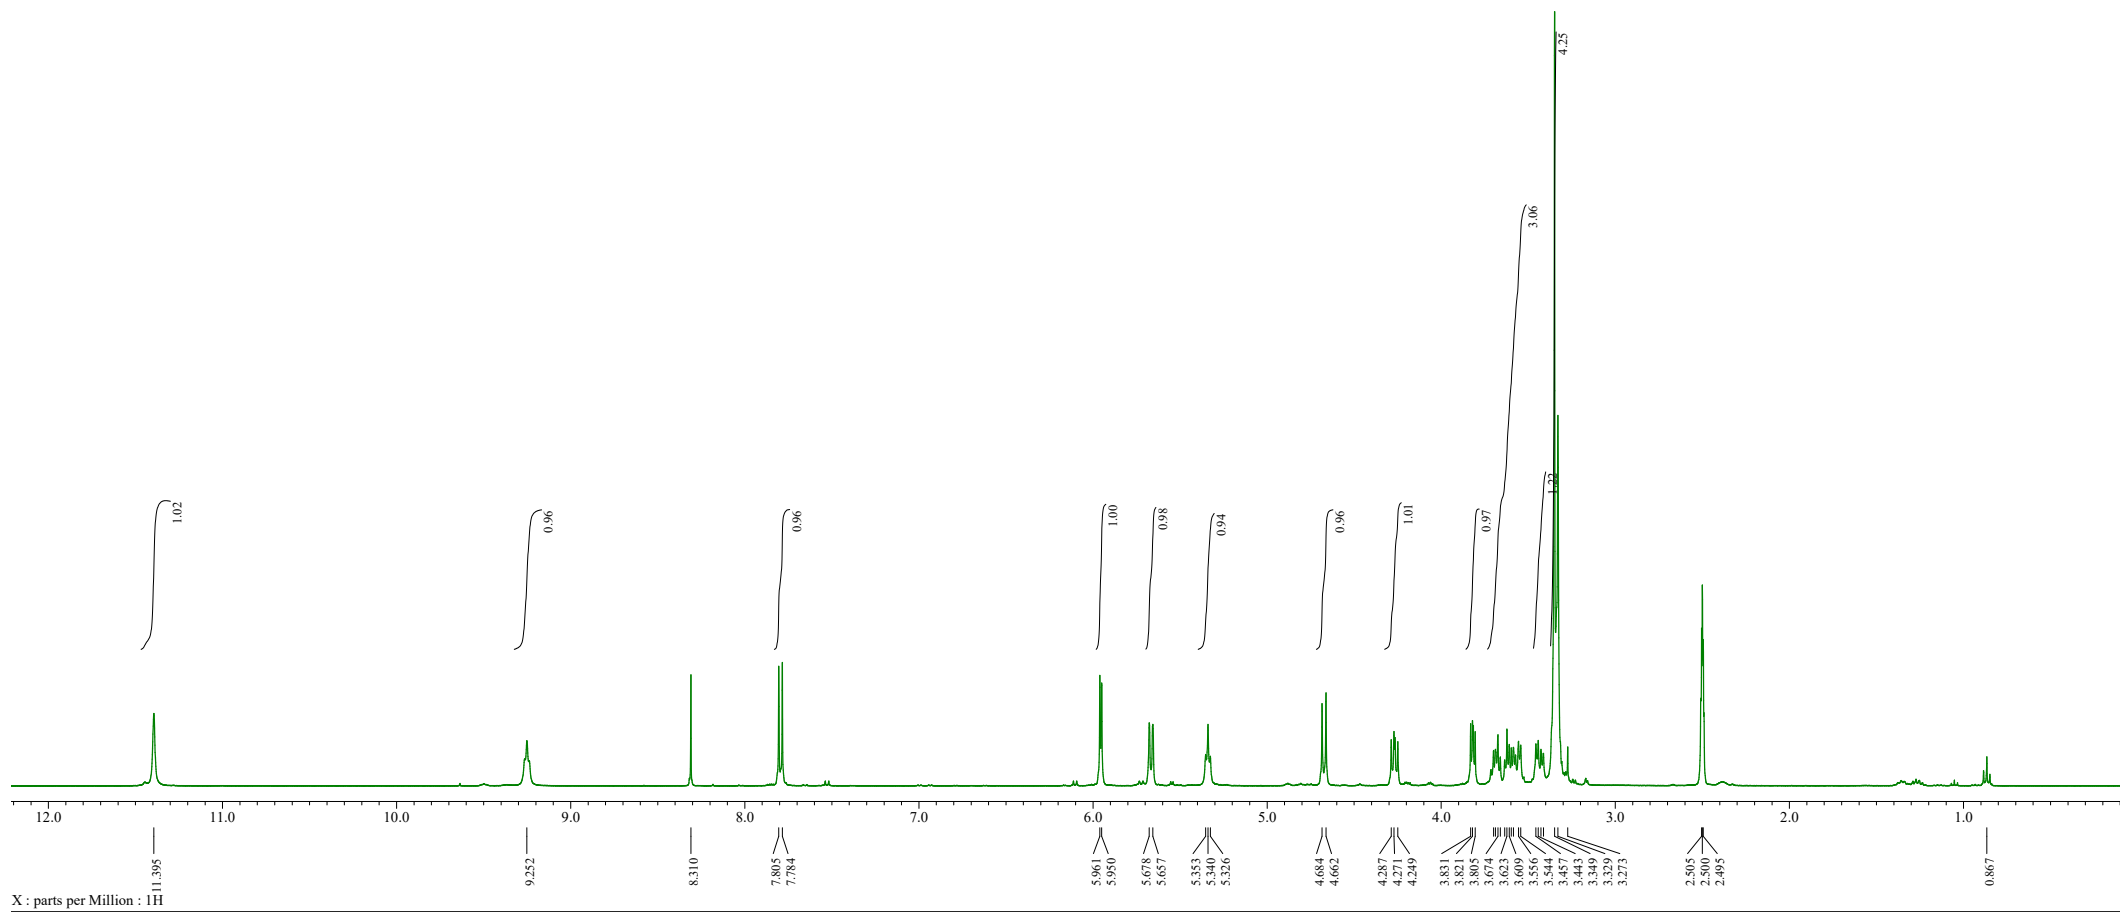

$^{13}\text{C}$  NMR spectrum of compound **11**

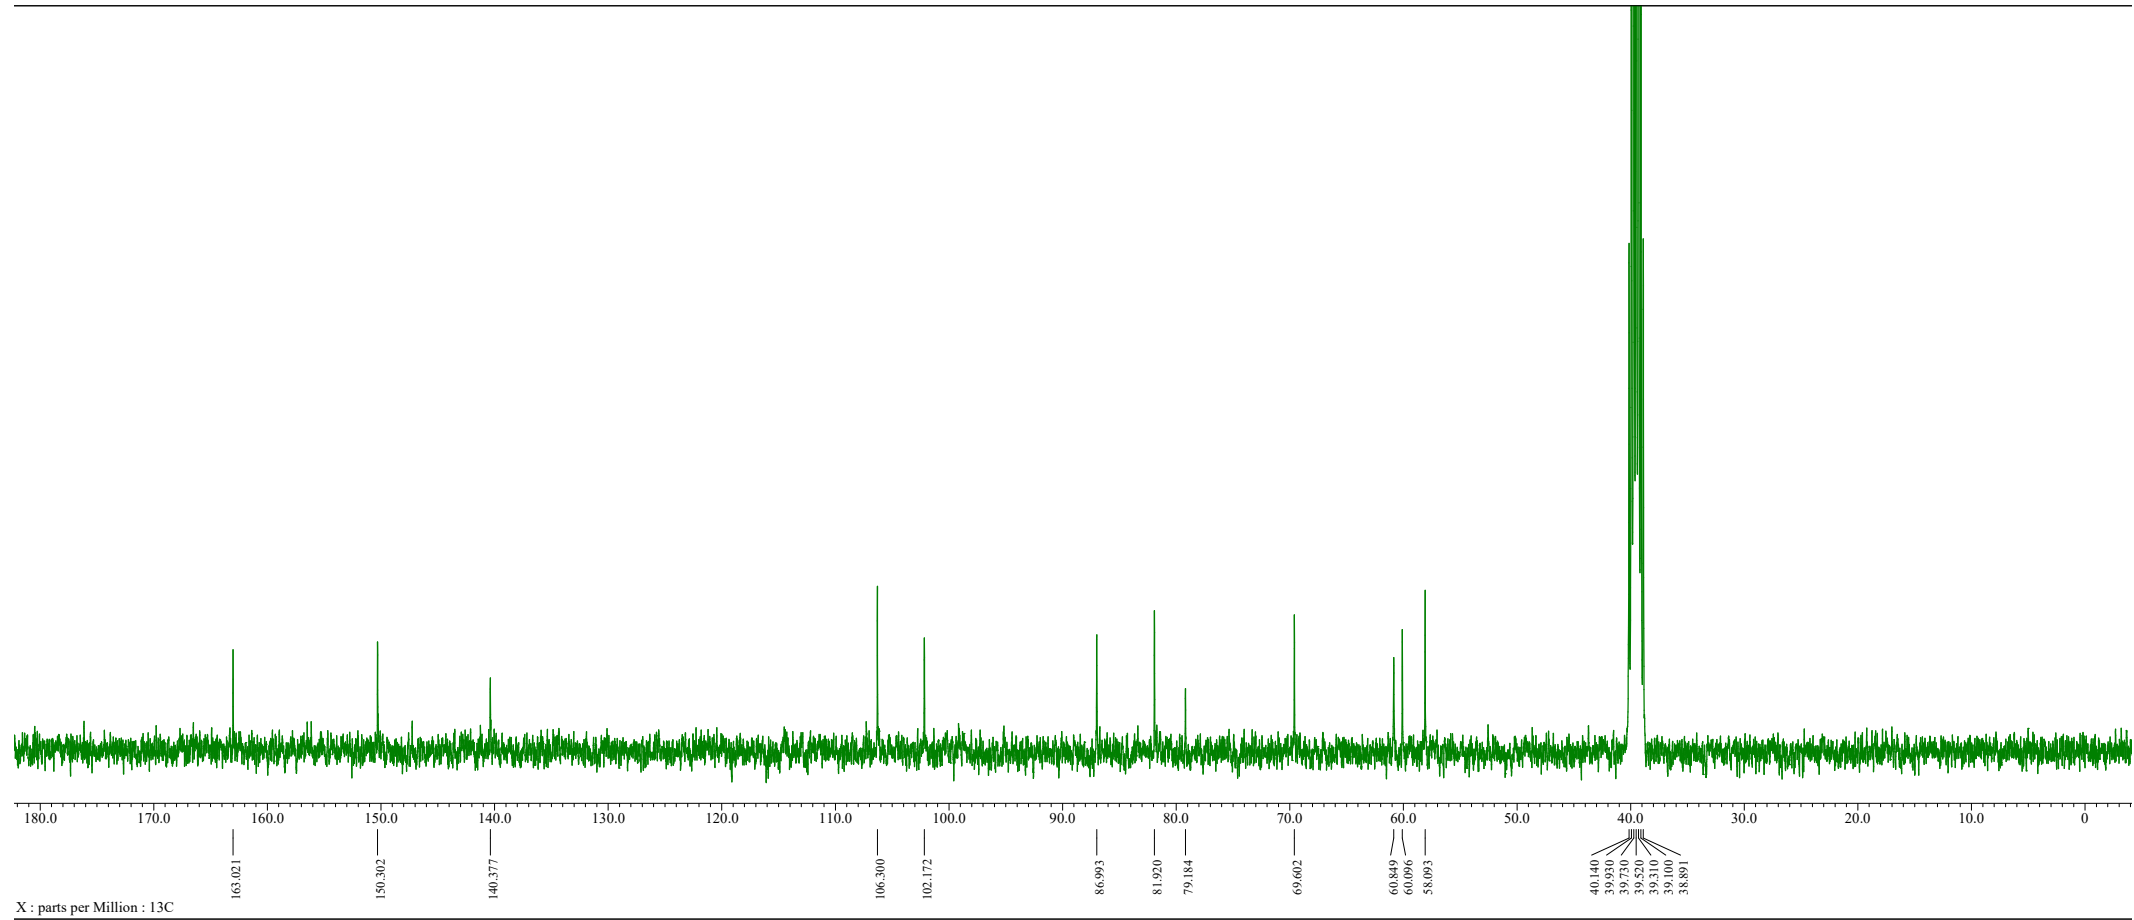

<sup>1</sup>H NMR spectrum of compound **13**

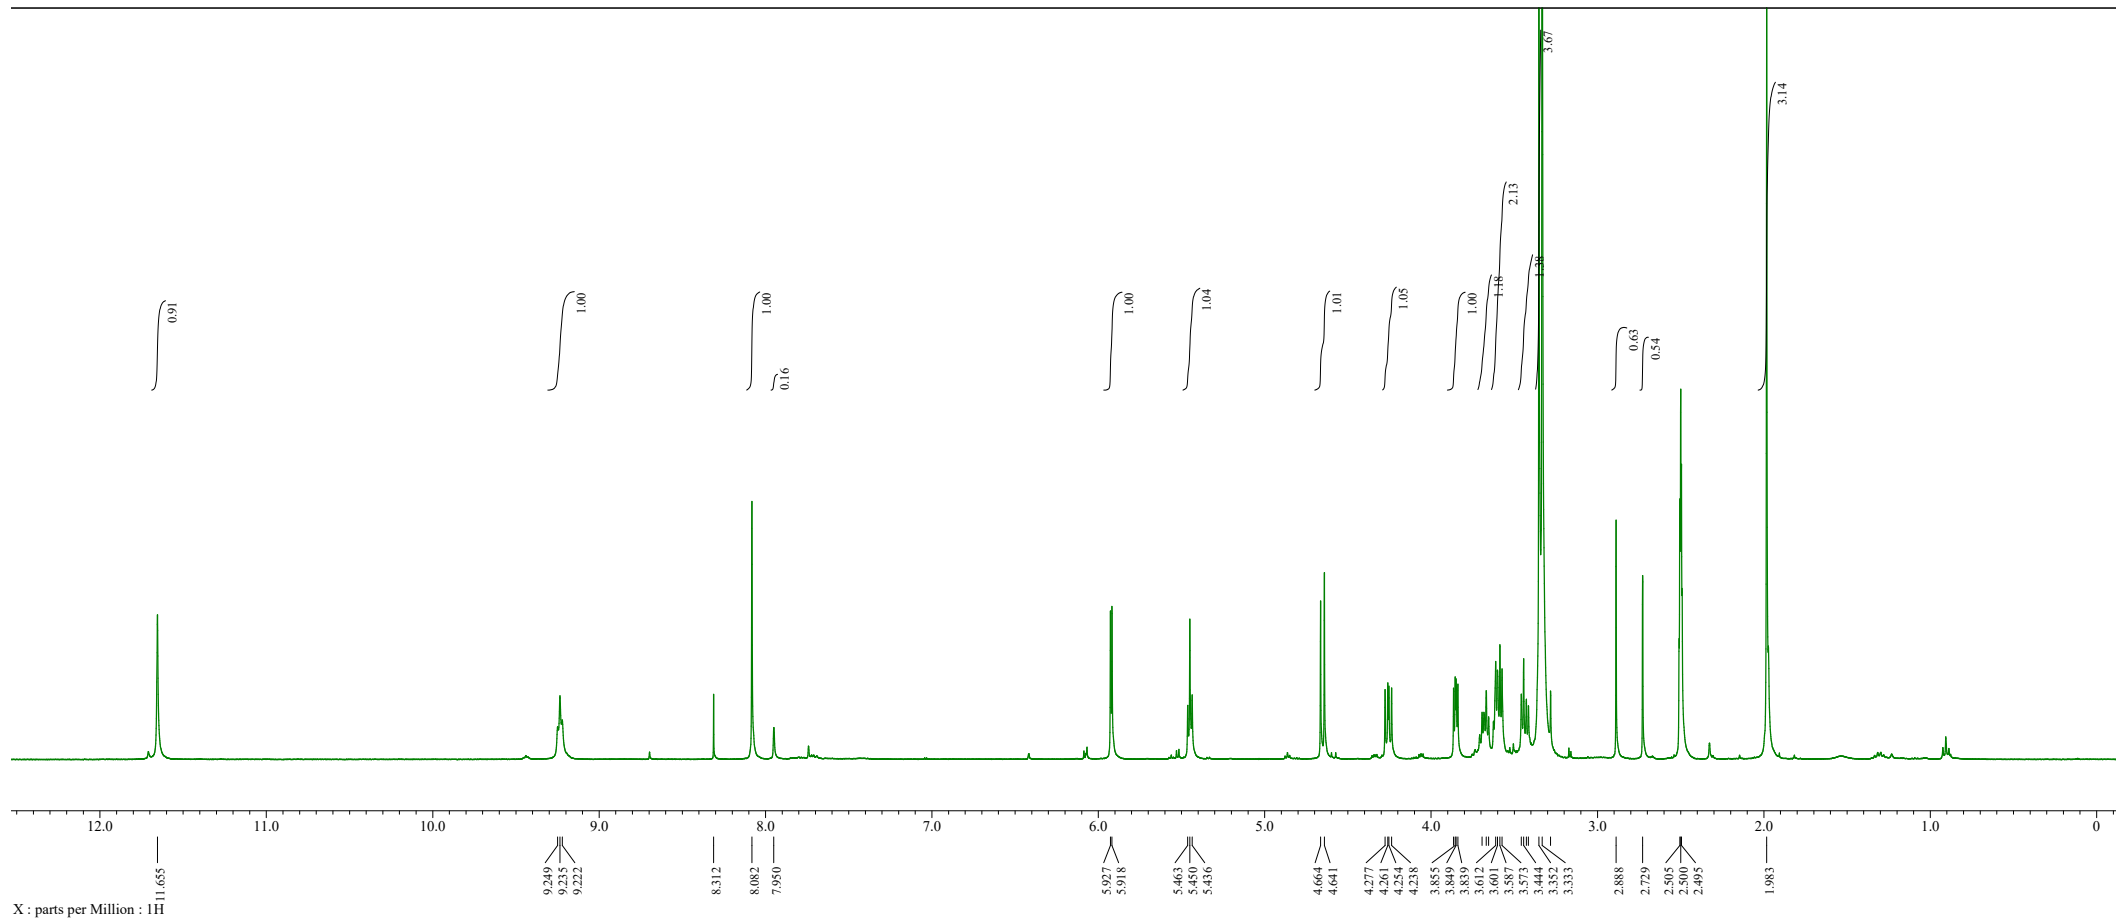

$^{13}\text{C}$  NMR spectrum of compound **13**

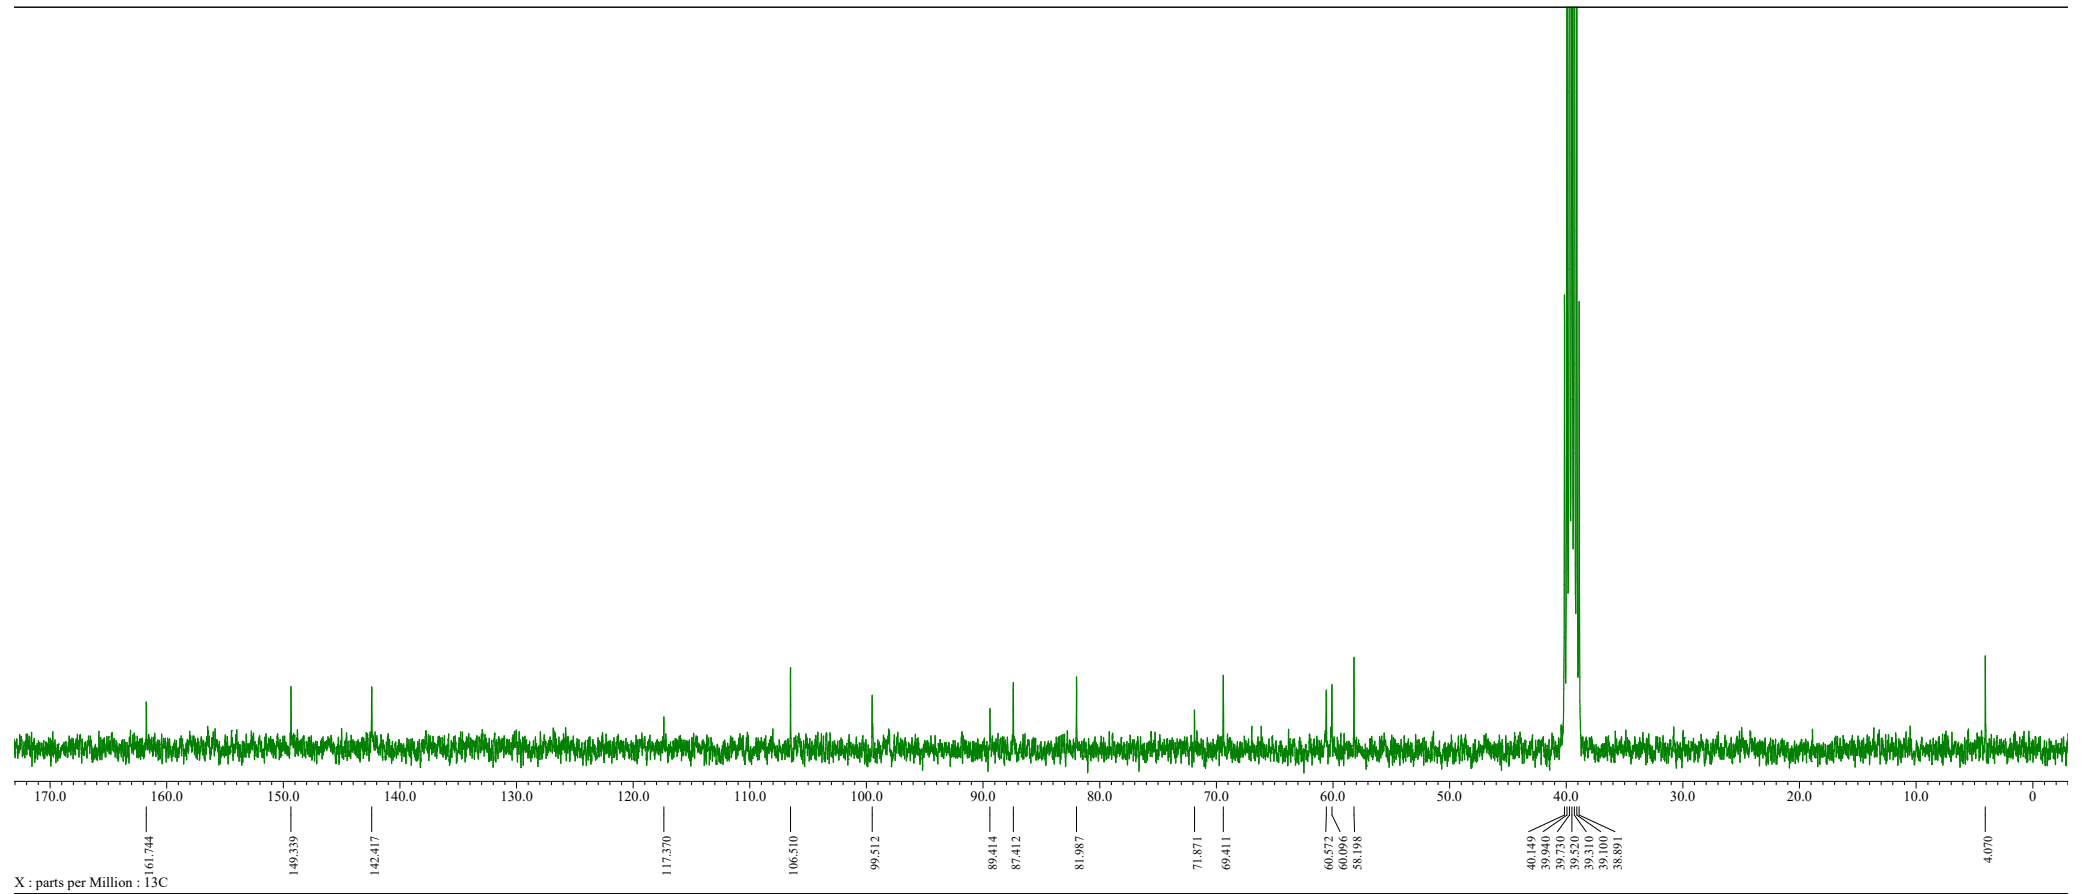



<sup>1</sup>H NMR spectrum of compound 14

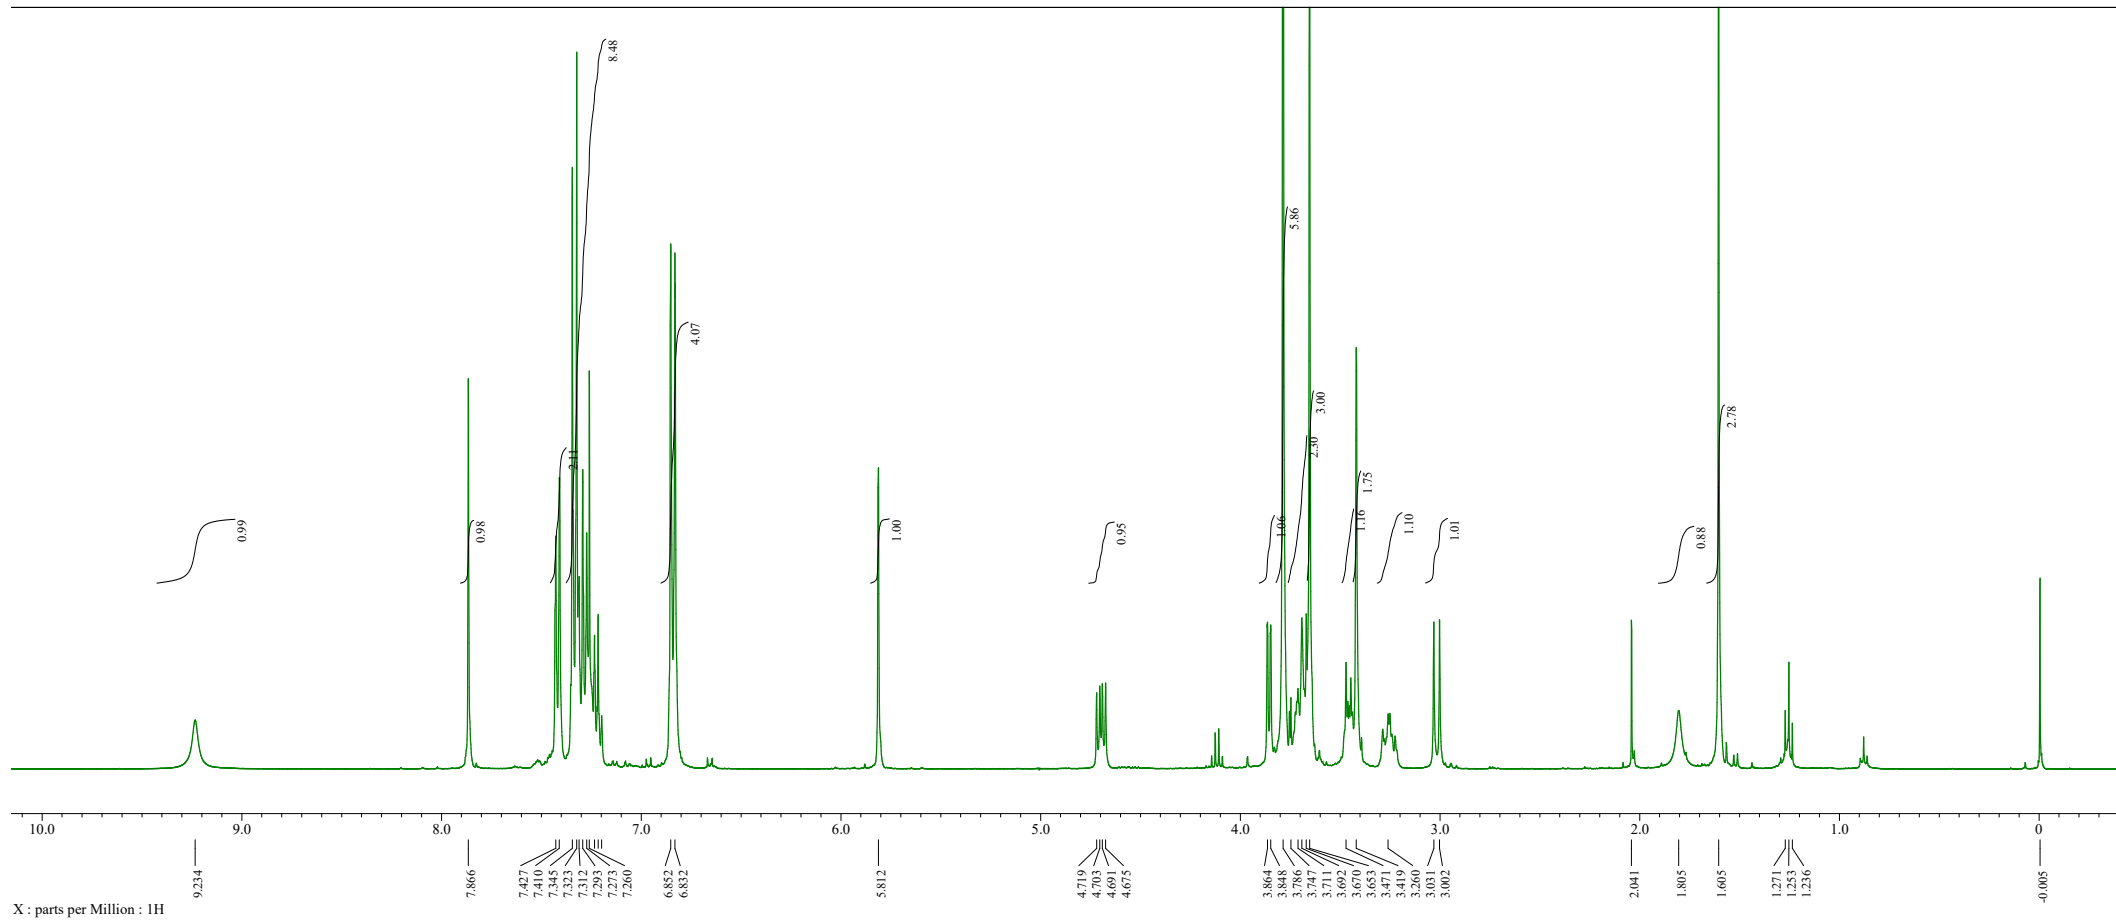

$^{13}\text{C}$  NMR spectrum of compound **14**

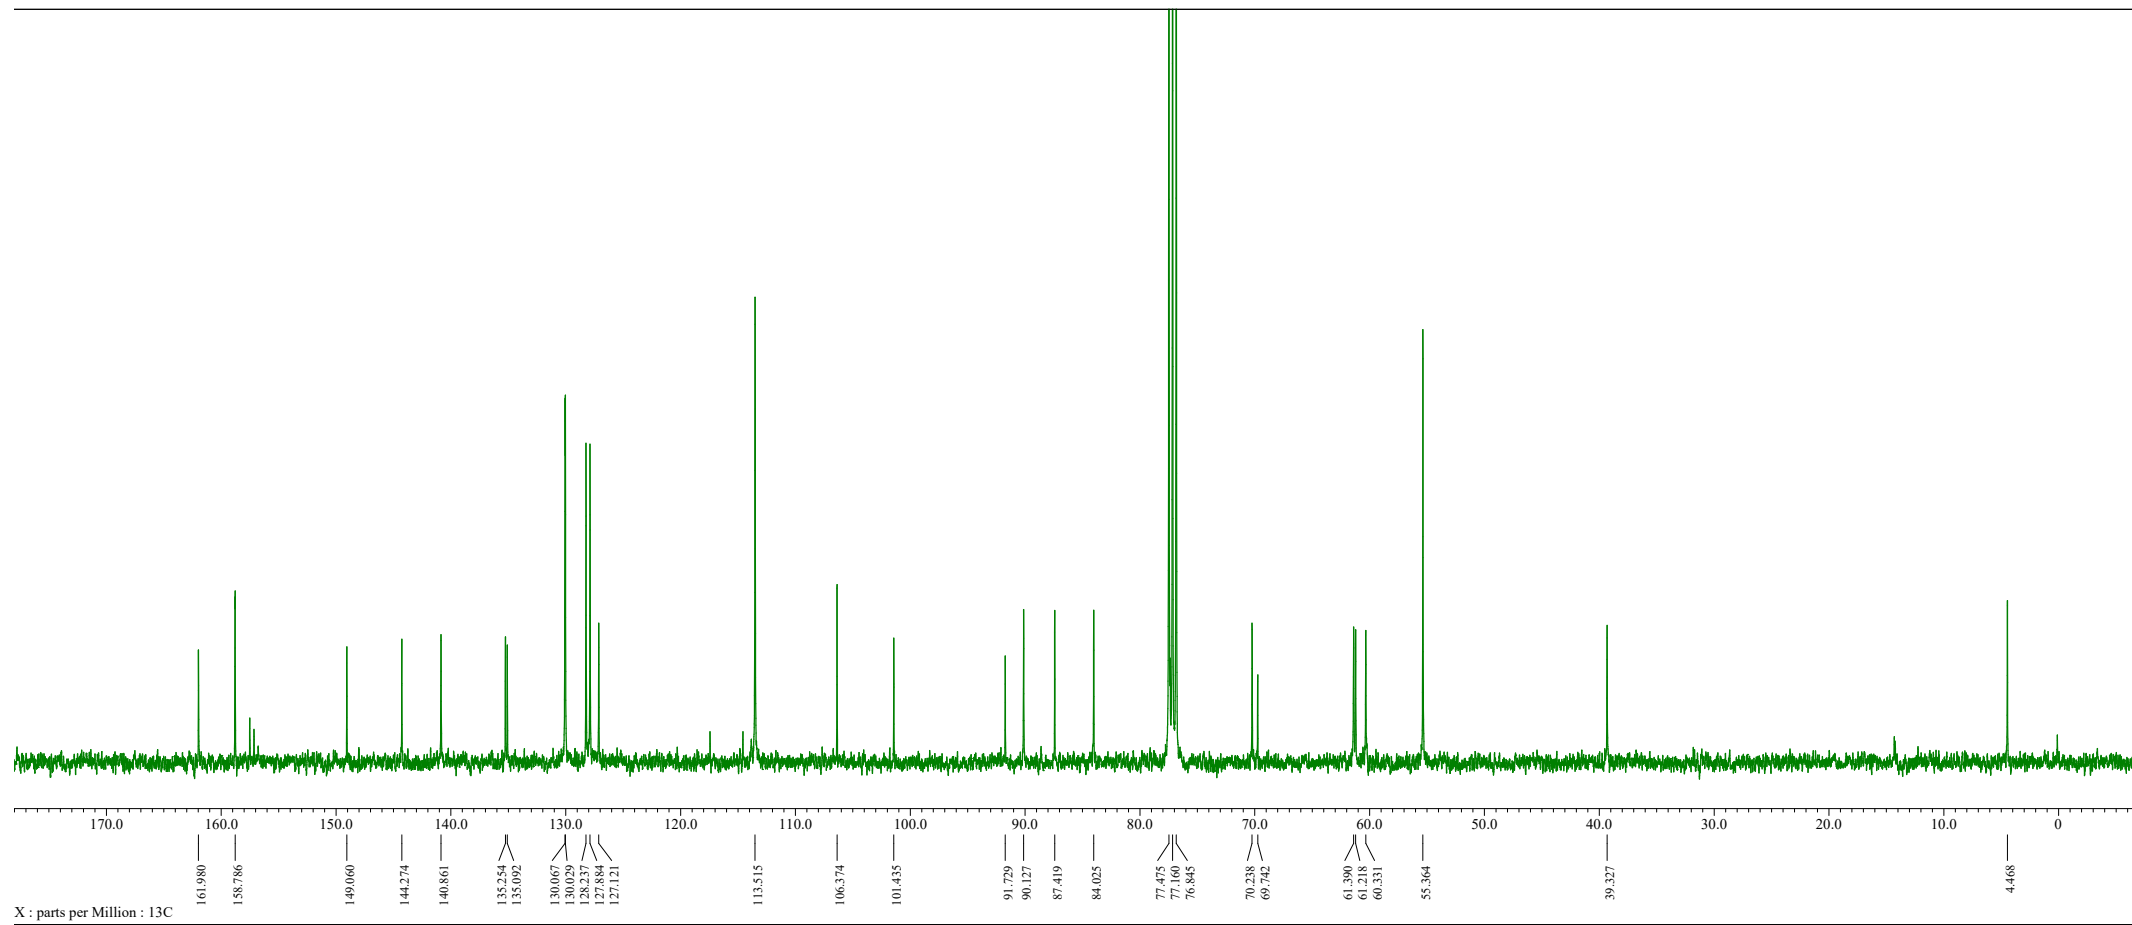

X : parts per Million : 13C

$^{31}\text{P}$  NMR spectrum of compound **15**

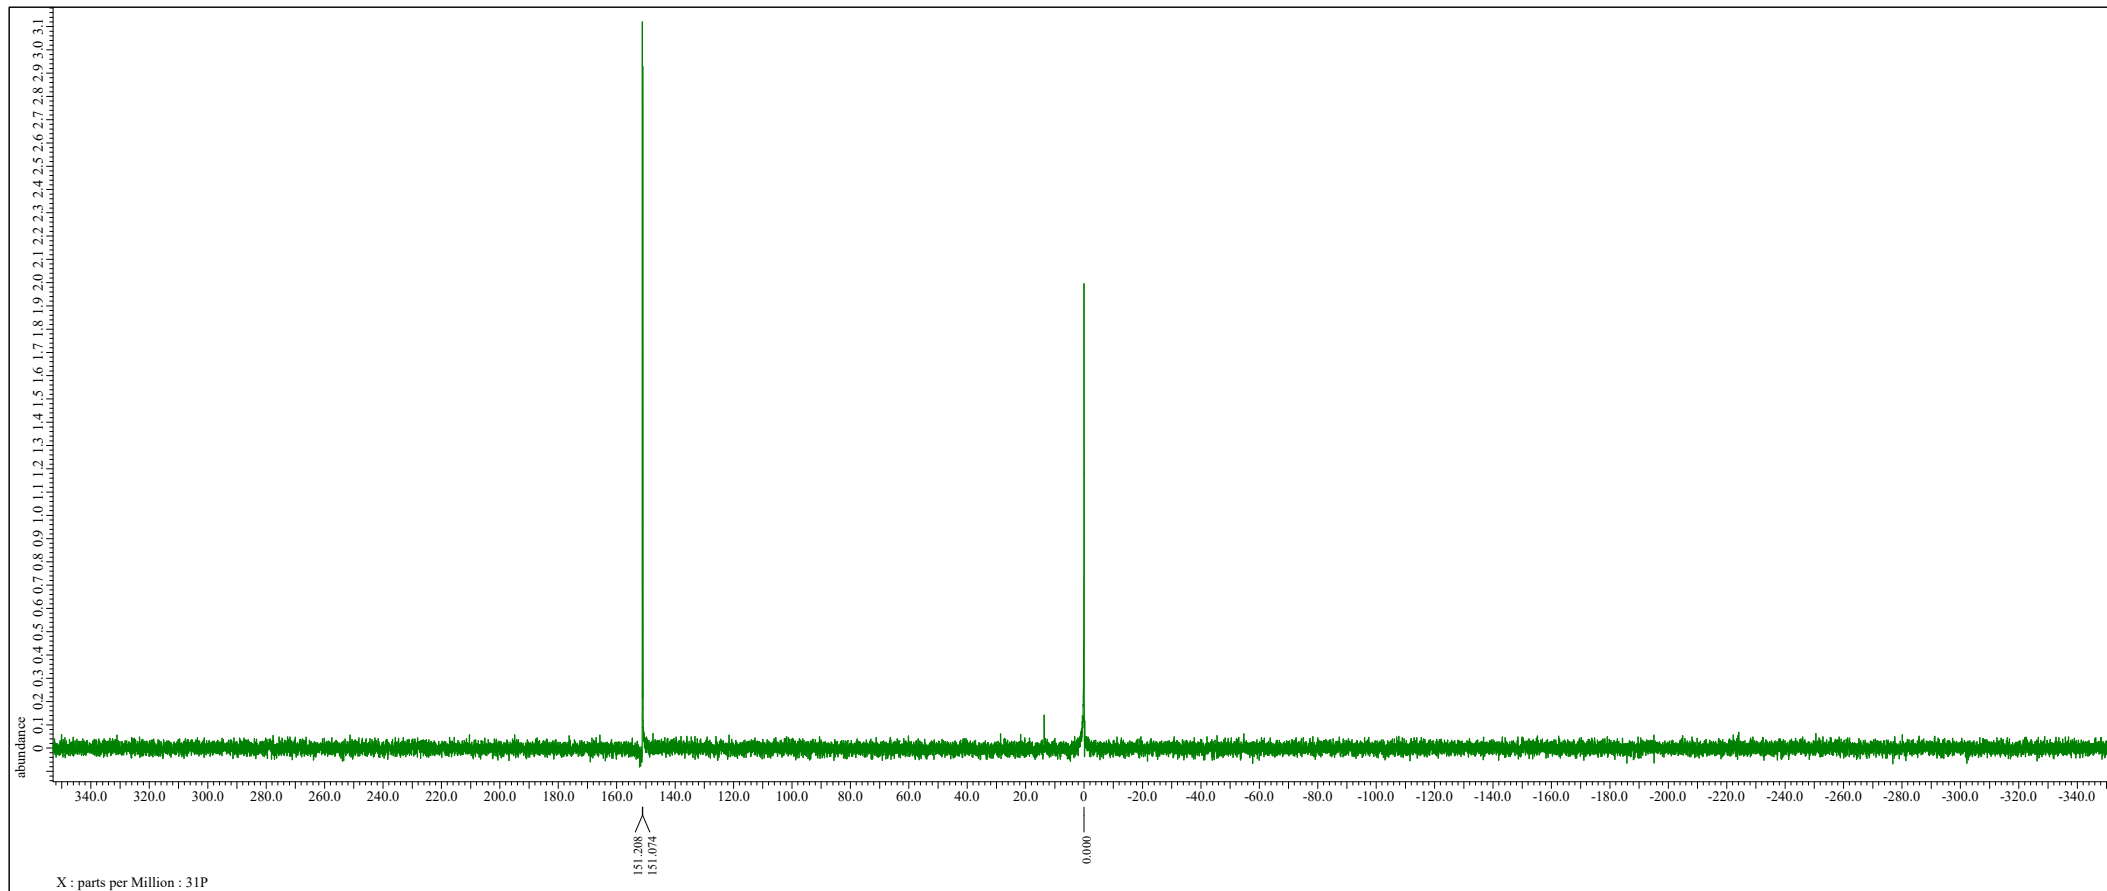

$^1\text{H}$ - $^1\text{H}$  COSY spectrum of compound **6**

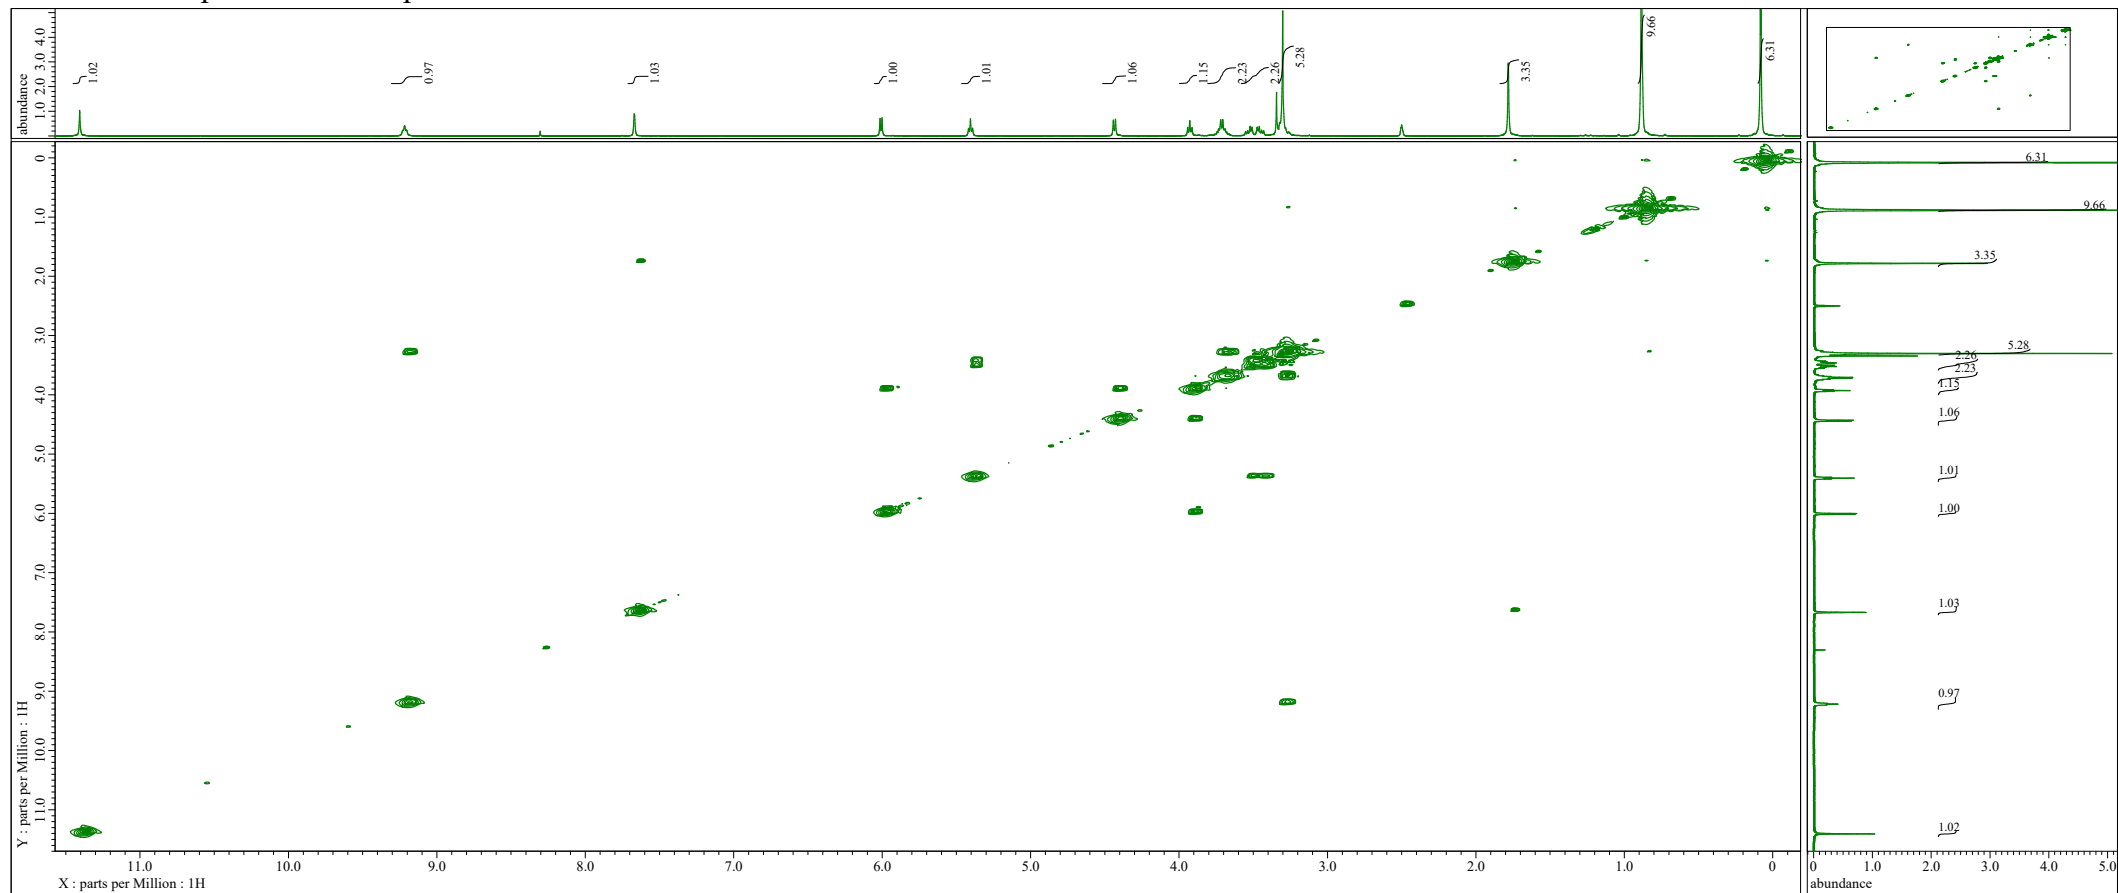

$^1\text{H}$ - $^1\text{H}$  NOESY spectrum of compound **6** (pick-up of H1'-H6' correlation)

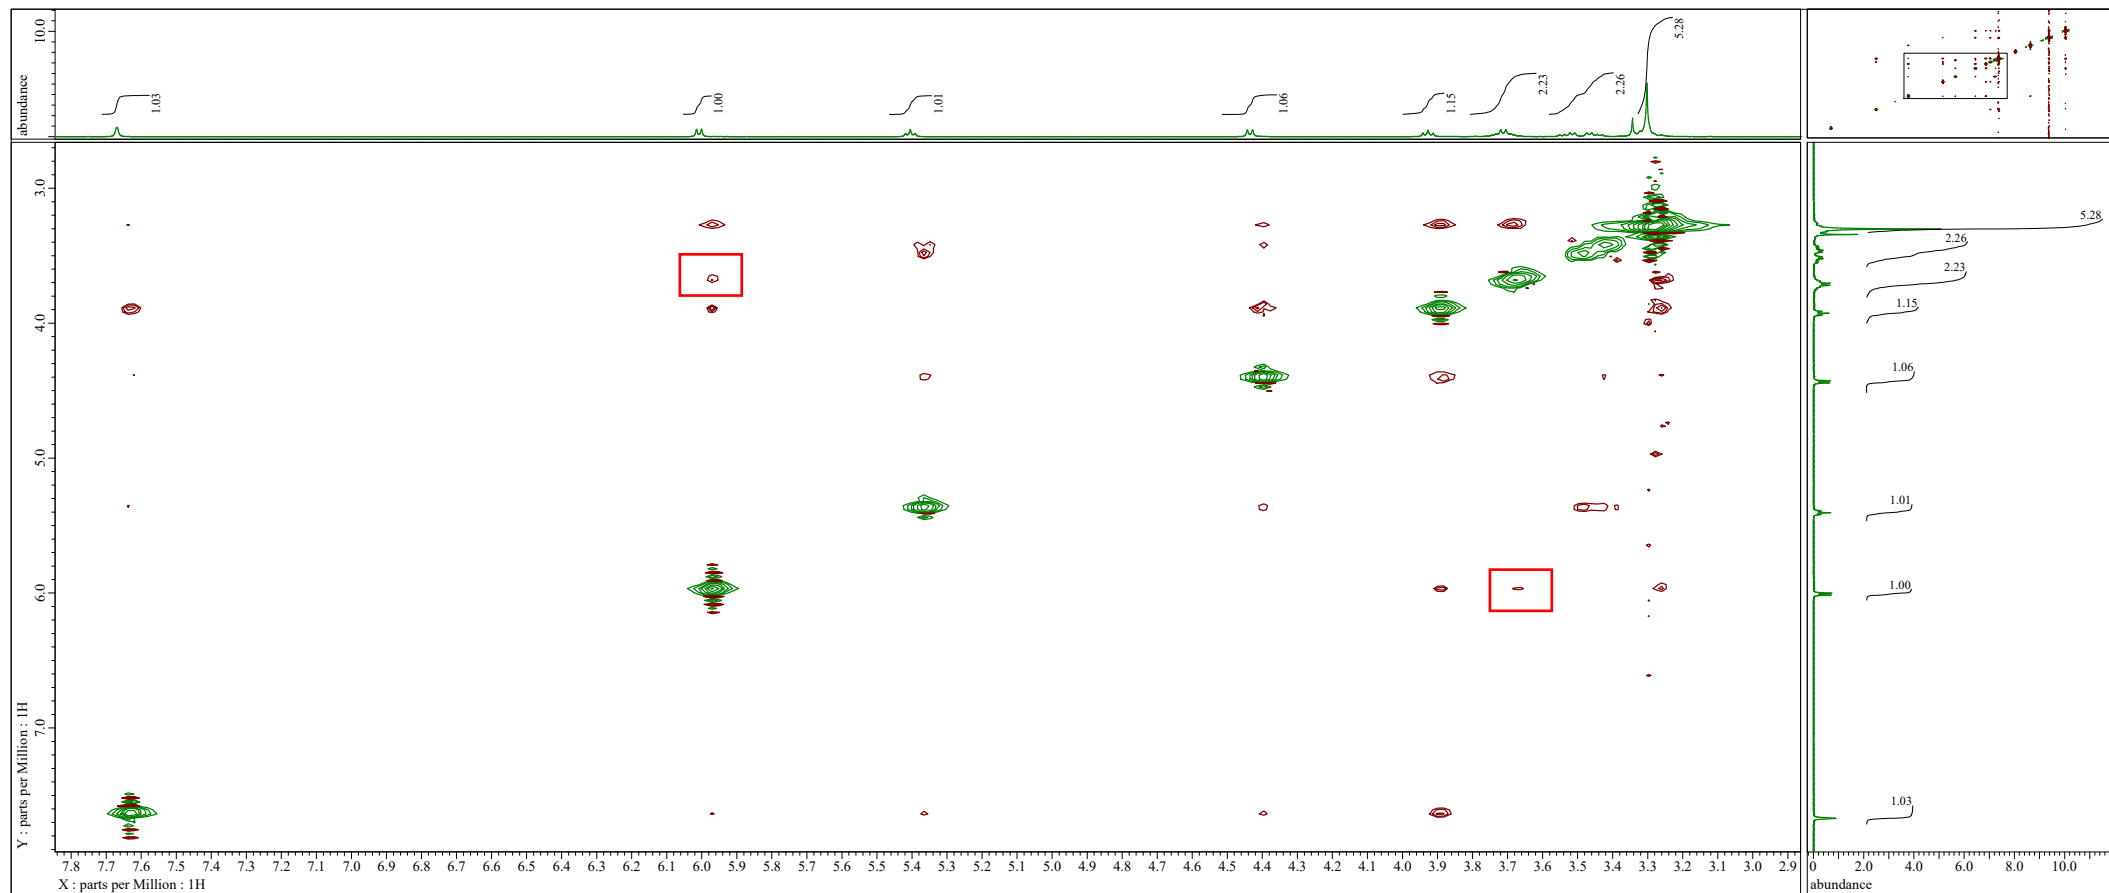

$^1\text{H}$ - $^1\text{H}$  NOESY spectrum of compound **6** (pick-up of H3'-H5' correlation)

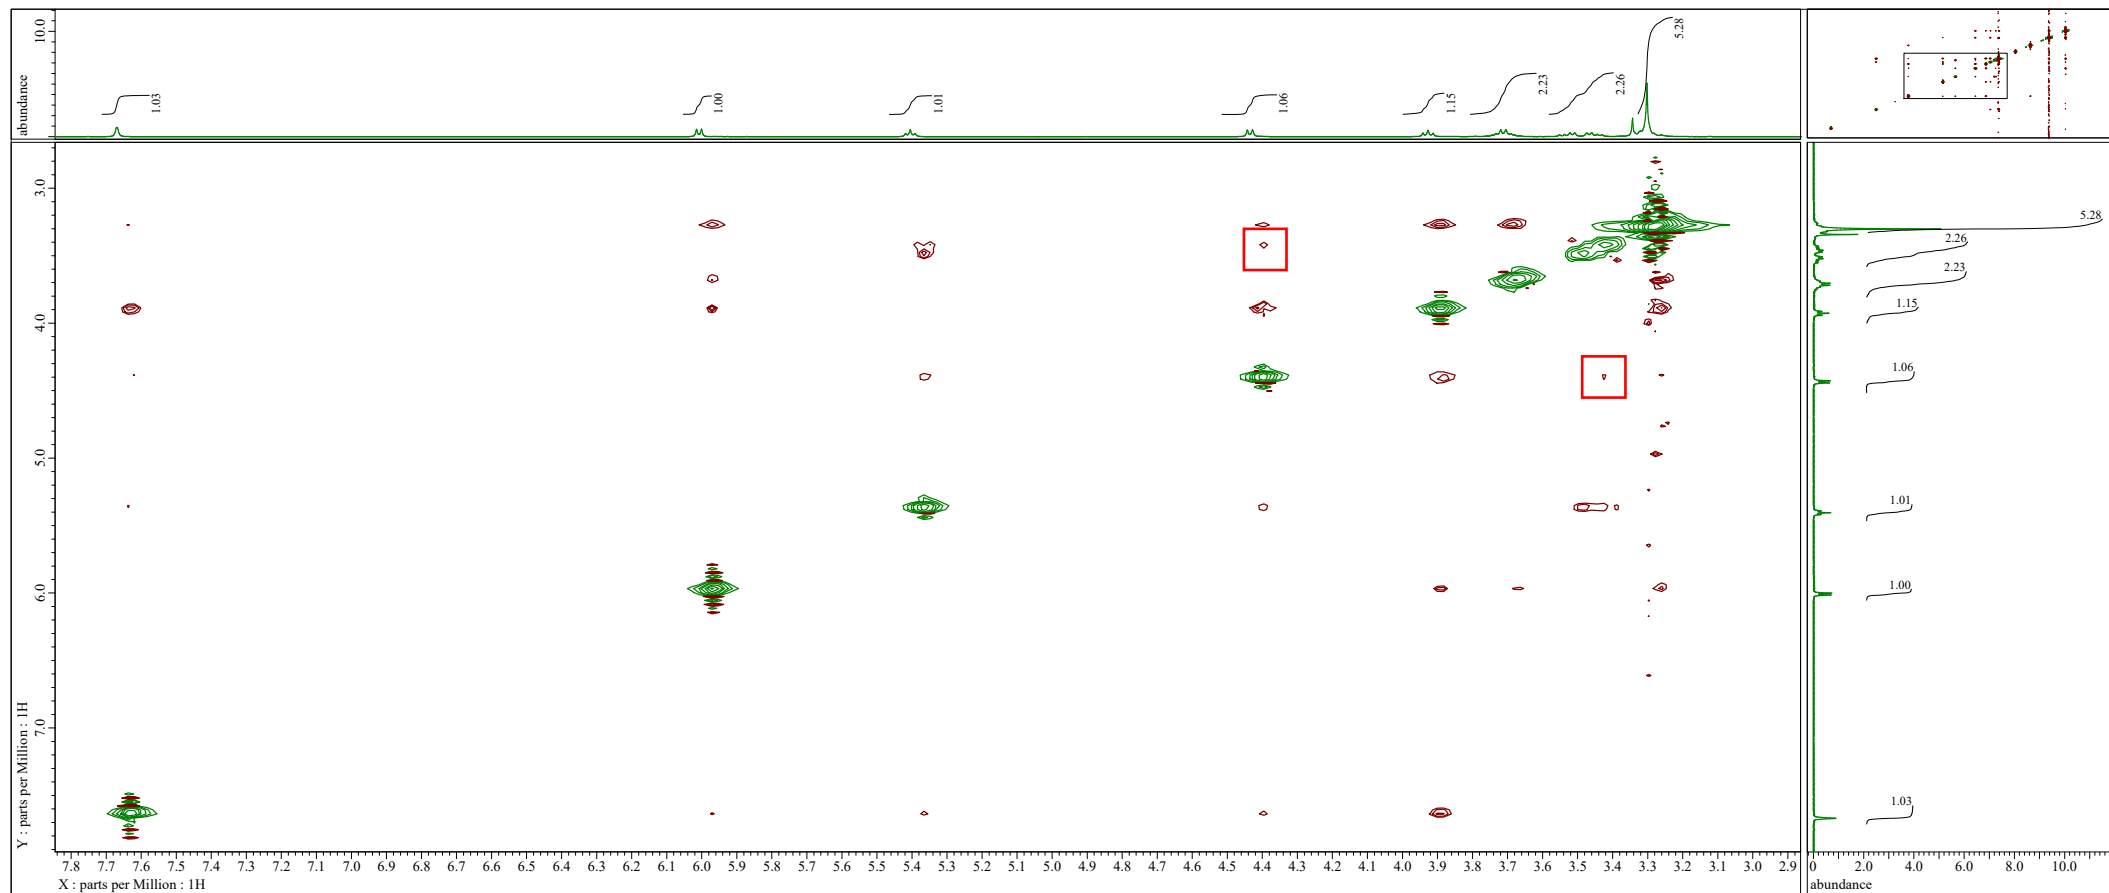

$^1\text{H}$ - $^1\text{H}$  NOESY spectrum of compound **6** (pick-up of H3'-OH5' correlation)

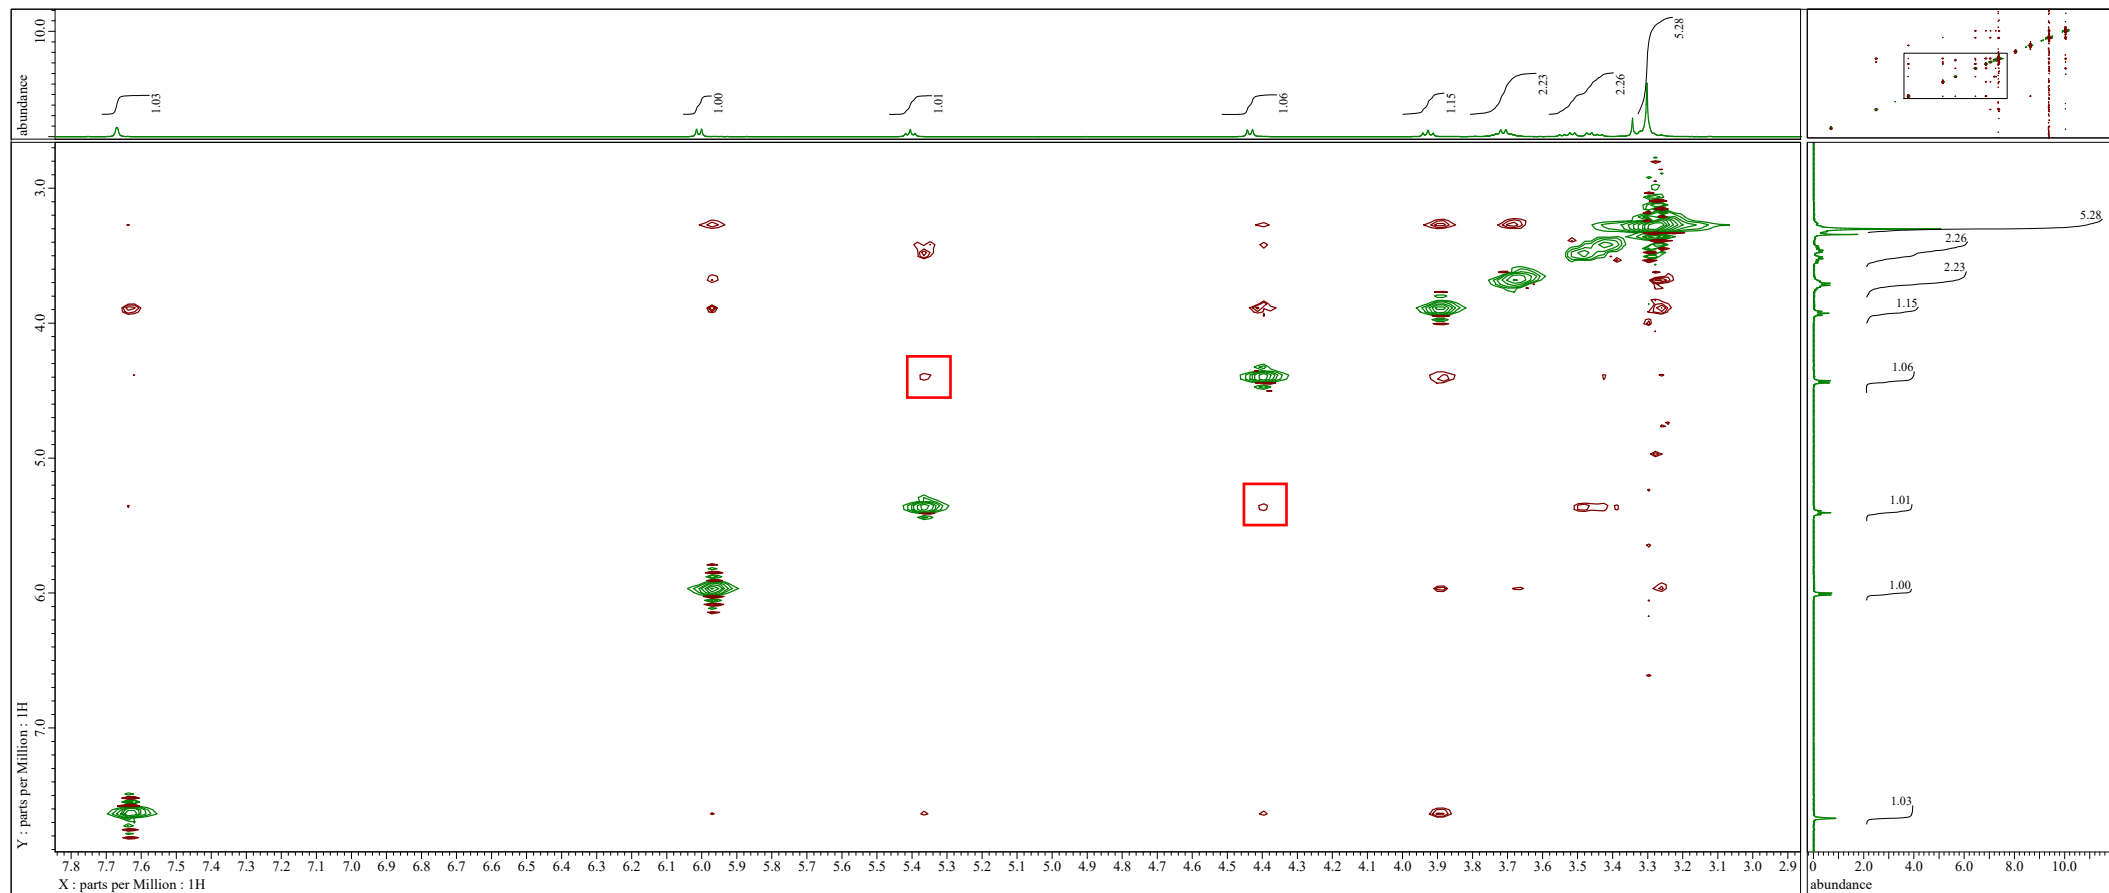

Supplement: d4ra06376g1.pdf [file d4ra06376g1.pdf]
